# Supplementary material
Source: Frontiers journal article supplement (https://www.frontiersin.org/articles/523991)

Fig S3. Correlation of samples in chickens

- (A) Pearson correlation coefficient between samples of different organizations
- (B) Pearson correlation coefficient between samples of different developmental stages
- (C) Principal component analysis between samples of different organizations
- (D) Principal component analysis between samples of different developmental stages

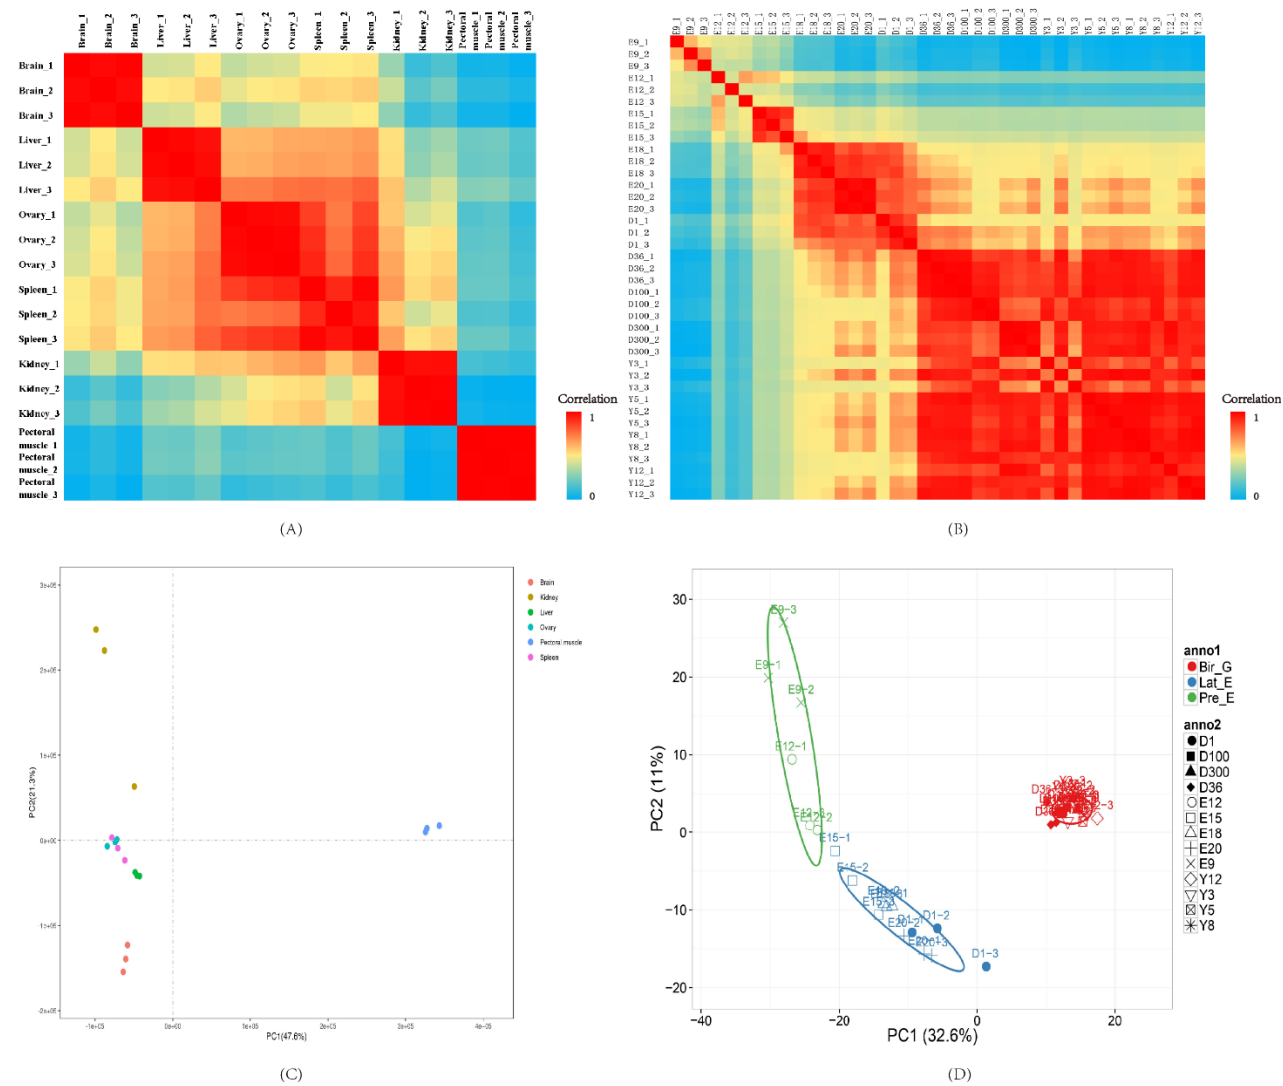

Supplement: Data_Sheet_1.ZIP [file Data_Sheet_1.ZIP]
