# Supplementary material
Source: Frontiers journal article supplement (https://www.frontiersin.org/articles/523991)
Supplement: Data_Sheet_1.ZIP [file Data_Sheet_1.ZIP]

Table S1. Descriptive summary of non-coding RNAs reads.

| Stage                  | Tissue          | Replicate | Raw Reads | Raw Bases | Clean reads | Clean Bases | Q20 (%) | Q30 (%) | Clean ratio (%) |
|------------------------|-----------------|-----------|-----------|-----------|-------------|-------------|---------|---------|-----------------|
| Embryonic day 5        | Whole embryo    | E5_1      | 11717838  | 585891900 | 9445172     | 472258600   | 97.97   | 95.8    | 80.61           |
|                        |                 | E5_2      | 12459492  | 622974600 | 10647581    | 532379050   | 97.91   | 95.56   | 85.46           |
|                        |                 | E5_3      | 13705971  | 685298550 | 11070098    | 553504900   | 97.58   | 95.04   | 80.77           |
| Embryonic day 7        | Whole embryo    | E7_1      | 13355853  | 667792650 | 11490277    | 574513850   | 97.73   | 95.38   | 86.03           |
|                        |                 | E7_2      | 11775403  | 588770150 | 10091937    | 504596850   | 97.77   | 95.44   | 85.70           |
|                        |                 | E7_3      | 10966536  | 548326800 | 9451567     | 472578350   | 98.25   | 96.39   | 86.19           |
| Embryonic day 9        | Pectoral muscle | E9_1      | 11105972  | 555298600 | 10177680    | 508884000   | 98.26   | 96.45   | 91.64           |
|                        |                 | E9_2      | 11922959  | 596147950 | 9576481     | 478824050   | 98.09   | 96.12   | 80.32           |
|                        |                 | E9_3      | 11623606  | 581180300 | 9909581     | 495479050   | 98.20   | 96.33   | 85.25           |
| Embryonic day 12       | Pectoral muscle | E12_1     | 12753867  | 637693350 | 11514871    | 575743550   | 98.23   | 96.34   | 90.29           |
|                        |                 | E12_2     | 11367638  | 568381900 | 9347754     | 467387700   | 98.05   | 95.99   | 82.23           |
|                        |                 | E12_3     | 12110097  | 605504850 | 10506872    | 525343600   | 98.12   | 96.13   | 86.76           |
| Embryonic day 15       | Pectoral muscle | E15_1     | 11233648  | 561682400 | 9644079     | 482203950   | 98.13   | 96.18   | 85.85           |
|                        |                 | E15_2     | 12315150  | 615757500 | 10274887    | 513744350   | 97.94   | 95.78   | 83.43           |
|                        |                 | E15_3     | 12766831  | 638341550 | 10472098    | 523604900   | 97.75   | 95.37   | 82.03           |
| Embryonic day 18       | Pectoral muscle | E18_1     | 12020461  | 601023050 | 10499106    | 524955300   | 97.60   | 95.11   | 87.34           |
|                        |                 | E18_2     | 11253272  | 562663600 | 9855109     | 492755450   | 97.99   | 95.82   | 87.58           |
|                        |                 | E18_3     | 11774589  | 588729450 | 9800409     | 490020450   | 97.98   | 95.84   | 83.23           |
| Embryonic day 20       | Pectoral muscle | E20_1     | 11565011  | 578250550 | 9878278     | 493913900   | 97.92   | 95.70   | 85.42           |
|                        |                 | E20_2     | 11423191  | 571159550 | 10289627    | 514481350   | 97.77   | 95.46   | 90.08           |
|                        |                 | E20_3     | 12933807  | 646690350 | 10229127    | 511456350   | 97.70   | 95.22   | 79.09           |
| At the age of 1 days   | Pectoral muscle | D1_1      | 12265316  | 613265800 | 10408394    | 520419700   | 98.10   | 96.11   | 84.86           |
|                        |                 | D1_2      | 13286996  | 664349800 | 11757924    | 587896200   | 98.02   | 95.95   | 88.49           |
|                        |                 | D1_3      | 12004696  | 600234800 | 10633176    | 531658800   | 97.61   | 95.18   | 88.58           |
| At the age of 36 days  | Pectoral muscle | D36_1     | 12841066  | 642053300 | 10643398    | 532169900   | 96.32   | 92.56   | 82.89           |
|                        |                 | D36_2     | 13363195  | 668159750 | 10366623    | 518331150   | 96.73   | 92.94   | 77.58           |
|                        |                 | D36_3     | 12663948  | 633197400 | 11113703    | 555685150   | 98.35   | 96.81   | 87.76           |
| At the age of 100 days | Pectoral muscle | D100_1    | 12763733  | 638186650 | 11052306    | 552615300   | 98.27   | 96.64   | 86.59           |
|                        |                 | D100_2    | 12380272  | 619013600 | 11329241    | 566462050   | 98.32   | 96.76   | 91.51           |
|                        |                 | D100_3    | 11503337  | 575166850 | 9987185     | 499359250   | 98.21   | 96.56   | 86.82           |
| At the age of 300 days | Pectoral muscle | D300_1    | 12966139  | 648306950 | 12233982    | 611699100   | 98.85   | 97.81   | 94.35           |
|                        |                 | D300_2    | 13311823  | 665591150 | 12419973    | 620998650   | 98.89   | 97.88   | 93.30           |
|                        |                 | D300_3    | 13389267  | 669463350 | 12611099    | 630554950   | 98.85   | 97.82   | 94.19           |
| At the age of 3 years  | Pectoral muscle | Y3_1      | 11700956  | 585047800 | 10259958    | 512997900   | 97.95   | 95.97   | 87.68           |
|                        |                 | Y3_2      | 12653478  | 632673900 | 10666588    | 533329400   | 96.26   | 92.45   | 84.30           |
|                        |                 | Y3_3      | 11091700  | 554585000 | 9757042     | 487852100   | 98.22   | 96.53   | 87.97           |
| At the age of 5 years  | Pectoral muscle | Y5_1      | 12357792  | 617889600 | 10773149    | 538657450   | 98.11   | 96.35   | 87.18           |
|                        |                 | Y5_2      | 12648050  | 632402500 | 10643780    | 532189000   | 98.10   | 96.24   | 84.15           |
|                        |                 | Y5_3      | 10897281  | 544864050 | 9793541     | 489677050   | 98.28   | 96.67   | 89.87           |
| At the age of 8 years  | Pectoral muscle | Y8_1      | 10875309  | 543765450 | 9807527     | 490376350   | 98.29   | 96.71   | 90.18           |
|                        |                 | Y8_2      | 11804560  | 590228000 | 9886534     | 494326700   | 98.15   | 96.47   | 83.75           |

|                           |                    |          |          |           |          |           |       |       |       |
|---------------------------|--------------------|----------|----------|-----------|----------|-----------|-------|-------|-------|
| At the age<br>of 12 years | Pectoral<br>muscle | Y8_3     | 11624472 | 581223600 | 10710795 | 535539750 | 98.18 | 96.44 | 92.14 |
|                           |                    | Y12_1    | 14637612 | 731880600 | 13010995 | 650549750 | 98.75 | 97.45 | 88.89 |
|                           |                    | Y12_2    | 11834791 | 591739550 | 10331616 | 516580800 | 98.27 | 96.63 | 87.30 |
| At the age<br>of 300 days | Brain              | Y12_3    | 13394371 | 669718550 | 11386894 | 569344700 | 95.75 | 91.60 | 85.01 |
|                           |                    | Brain_1  | 14427259 | 721362950 | 12625077 | 276362294 | 98.34 | 96.22 | 87.51 |
|                           |                    | Brain_2  | 13955210 | 697760500 | 12251469 | 274973013 | 98.14 | 95.87 | 87.79 |
| At the age<br>of 300 days | Liver              | Brain_3  | 11726536 | 586326800 | 10241526 | 224477010 | 98.21 | 96.02 | 87.34 |
|                           |                    | Liver_1  | 12578136 | 628906800 | 10961286 | 241736535 | 98.08 | 95.82 | 87.15 |
|                           |                    | Liver_2  | 12179928 | 608996400 | 10752474 | 241519038 | 97.77 | 95.43 | 88.28 |
| At the age<br>of 300 days | Ovary              | Liver_3  | 11874646 | 593732300 | 10397486 | 232176820 | 98.06 | 95.84 | 87.56 |
|                           |                    | Ovary_1  | 12938349 | 646917450 | 11639429 | 254221914 | 98.41 | 96.40 | 89.96 |
|                           |                    | Ovary_2  | 13680766 | 684038300 | 12525439 | 285239706 | 98.08 | 95.77 | 91.56 |
| At the age<br>of 300 days | Spleen             | Ovary_3  | 12786946 | 639347300 | 11675159 | 268383488 | 98.34 | 96.26 | 91.31 |
|                           |                    | Spleen_1 | 12840466 | 642023300 | 11208342 | 246962511 | 98.21 | 96.06 | 87.29 |
|                           |                    | Spleen_2 | 14119721 | 705986050 | 12531655 | 279558347 | 98.13 | 95.87 | 88.75 |
| At the age<br>of 300 days | Kidney             | Spleen_3 | 13246252 | 662312600 | 11556617 | 254881453 | 98.27 | 96.11 | 87.24 |
|                           |                    | Kidney_1 | 12367339 | 618366950 | 10805639 | 257513828 | 98.25 | 96.02 | 87.37 |
|                           |                    | Kidney_2 | 13962934 | 698146700 | 12622332 | 283292019 | 98.15 | 95.88 | 90.4  |
|                           |                    | Kidney_3 | 12069580 | 603479000 | 10789336 | 241986024 | 98.41 | 96.36 | 89.39 |
