# Supplementary material
Source: Frontiers journal article supplement (https://www.frontiersin.org/articles/523991)
Supplement: Data_Sheet_1.ZIP [file Data_Sheet_1.ZIP]

| new_name         | consensus mature sequence | consensus star sequence   | consensus precursor sequence                                                       |
|------------------|---------------------------|---------------------------|------------------------------------------------------------------------------------|
| new-gga-miRNA-1  | ugagaugaagcacugucgucg     | ggugcagugcugcaucucuggu    | ggugcagugcugcaucucuggucaauugggagucugagauaagcacugucgucg                             |
| new-gga-miRNA-2  | caacggaaucccaaaagcagcug   | cugccucggggaauucguuacc    | caacggaaucccaaaagcagcugucccgagcgccagcugccucgggaauucguuacc                          |
| new-gga-miRNA-3  | aauagacacgaucacuccgcugag  | caucgggggagucgugucugucc   | aauagacacgaucacuccgcugagcgcgagccacagagccaucggggaugucgugucgucc                      |
| new-gga-miRNA-4  | accugugagacucgaaauuugug   | caauuucgucucuaaggggaaau   | accugugagacucgaaauuugugugagcgucuccgagucgcaauuucgucucuaaggggaaau                    |
| new-gga-miRNA-5  | uuuggcaauugguagaacucacac  | uuguucucagacuugccaacu     | uuuggcaauugguagaacucacacugugcgucgaggaucgggucugagacuugccaacu                        |
| new-gga-miRNA-6  | aggacugucuaaccugagaaau    | aucucaggguucgucagcccauga  | aggacugucuaaccugagaaauugguagaacauaggggucaaucucaggguucgucagcccauga                  |
| new-gga-miRNA-7  | ugaggugagucgguuuguaauugu  | cgaugcagccgacuaucuuccc    | ugaggugagucgguuuguaauuggggggcgaggauuggggccacacucgagguaacgaugcagccgacuaucuuccc      |
| new-gga-miRNA-8  | aacaguaagagugagugugcgg    | ugcaugugagcuccuacugccg    | aacaguaagagugagugugcggcgaacgcagccugcaugugagcuccuacugccg                            |
| new-gga-miRNA-9  | ucagugcaucacagaacuuggu    | gaggguucuguccuacacuccggcu | gaggguucuguccuacacuccggcuguggucauugggcagucagugcaucacagaacuuggu                     |
| new-gga-miRNA-10 | agccacugacuaacgcacauug    | cugugcgugugacagcggu       | agccacugacuaacgcacauuugugucucggcgacuccacugugcgugugacagcggu                         |
| new-gga-miRNA-11 | uccagcaucagugauuuuugug    | aacaauauccggugcugagug     | aacaauauccggugcugagugagugcacacagagacuccagcaucagugauuuuugug                         |
| new-gga-miRNA-12 | ccucgacacaagcuuuuguc      | cugauucuggggucggggu       | cugauucuggggucgggguucguacguagcagagcagcucccugcugcgaucuaugagagugagccucgacacaagcuuuug |
| new-gga-miRNA-13 | uaacagucuaacagucagggcu    | accuuggcucuaagacugcuuacu  | accuuggcucuaagacugcuuacugcugcguaggggagcaggaacagucuaacagucuaagggcu                  |
| new-gga-miRNA-14 | accgggcuuuagauuuguacu     | uaacagucuaacagcgaugggucg  | accgggcuuuagauuuguuacugugcugcuggggggguaacagucuaacagcgaugggucg                      |
| new-gga-miRNA-15 | aagcccuuaccccaaggaau      | cuuuuugcgugucgggcuugc     | cuuuuugcgugucgggcuugcugcuuacauaaccuaccgggaagcccuuaccccaaggaau                      |
| new-gga-miRNA-16 | gucgacacaagcuuuugu        | cggggcggggucggcgcg        | gucgacacaagcuuuugucggagcgcgaggcgcgagcgcgcgugcgcgccccgcgcgggggcggggucggcg           |
| new-gga-miRNA-17 | ccccaucgaauugcucucag      | aaggggcaaacccgaugggcac    | ccccaucgaauugcucucaggaacgaugaaagcagaaggggcaaacccgaugggcac                          |
| new-gga-miRNA-18 | cacagcaagugagagagcgca     | ccugucugugccugcugua       | ccugucugugccugcuguaacagguagaggauguuucgacagcaagugagagagcgca                         |
| new-gga-miRNA-19 | cuuuuugcgugucgggcuugc     | aagcccuuaccccaaggaau      | cuuuuugcgugucgggcuugcugugccccacagcucucaggaaagcccuuaccccaaggaau                     |
| new-gga-miRNA-20 | gaugaaaucccccuaugggcugu   | ggauagguuggguuucuaugaau   | gaugaaaucccccuaugggcuguuugugaugguaccgaggaugaggguuggguuucuaugaau                    |
| new-gga-miRNA-21 | uucccaugacugugguaguca     | acuccaaacaugccuggaagcuu   | acuccaaacaugccuggaagcuuuauguaaauaaaaauucccaugacugugguaguca                         |
| new-gga-miRNA-22 | uccgacacaagcuuuugu        | uugauuucgggucggggg        | uugauuucgggucggggguuucguacguagcagcgagcugcuccugcugcgaucuaugagagucagccuccgacacaagc   |
| new-gga-miRNA-23 | aggcaguguaauuguauuagcu    | agcaacuacucacugccaca      | aggcaguguaauuguauuagcugcucuaacaccagcaacuacacugccaca                                |
| new-gga-miRNA-24 | cugaccgcucucuccgcaga      | cagcgggggcgggcgggcgcg     | cagcgggggcgggcgggcgcgcgagcgcgagcugaccgcucucuccgcaga                                |
| new-gga-miRNA-25 | uuugggugcagccccguugcg     | ggagcggggucgggauccaggac   | ggagcggggucgggauccaggaccugcugcgggcauuggaaguguuuugggugcagccccguugcg                 |
| new-gga-miRNA-26 | gcccagcgccgugcugcgucg     | agcugcgacccggcgcgucgu     | gcccagcgccgugcugcgucgugagcugcagcugcgacccgcgcgugcgu                                 |
| new-gga-miRNA-27 | uuuccaacuucugauuucuga     | agaaucaugaagguugggaaga    | uuuccaacuucugauuucugauuucuaauagggaucacagaaucaugaagguugggaaga                       |
| new-gga-miRNA-28 | cccggggugggcagcgugua      | cccagcacgccuaccggggcc     | cccggggugggcagcguguaacggcacgcagcgugccccagcacgccuaccggggcc                          |
| new-gga-miRNA-29 | auggcuguuuacagcagaugac    | ccuacugcuaagguuugcccu     | ccuacugcuaagguuugcccuuaaacauagguugcucucuaauggcuguuuacagcagaugac                    |
| new-gga-miRNA-30 | ucugucugcuggggauggaca     | aaguccacugcauauagagggug   | aaguccacugcauauagagggugaagaauaacgaauuuuacucugucuggggauggaca                        |
| new-gga-miRNA-31 | ucugaugucccuuugccccgag    | auggguaacgggucugcaguca    | auggguaacgggucugcagucauucugaugucccuuugccccgag                                      |
| new-gga-miRNA-32 | cuggaccgccccugguuaga      | ugaucaagugguugugacagcu    | ugaucaagugguugugacagcuauuucuaaaucugcuggaccgccccugguuaga                            |
| new-gga-miRNA-33 | ucugggggugcggaggguacug    | gggcccuccgcacgcuucuguc    | gggcccuccgcacgcuucugugggggaucgaaauagcgcgagcugugggggugcggaggguacuga                 |
| new-gga-miRNA-34 | cccgcggugggcgccgggc       | cccgcggcgccgugcg          | cccgcggcgccgugcgcauaaaaccggcgugggcgccgggc                                          |
| new-gga-miRNA-35 | ucaugggugcucucuccagg      | cugguagagaagcgugcugggag   | cugguagagaagcgugcugggagcugguagggcaagcucugguucuaugugcucucuccagg                     |
| new-gga-miRNA-36 | gaucuccaaucugcgcgguugc    | uaacugucuaaauggagagaga    | gaucuccaaucugcgcgguugcauugcuaaggauguaacugucuaaauggagagaga                          |
| new-gga-miRNA-37 | uaguucagcugucugugaauag    | ucaucagagaggcguggucug     | uaguucagcugucugugaauaggggcagagaccucaucagagaggcguggucug                             |
| new-gga-miRNA-38 | gcagggcgaggagcugccccgu    | agggcagcuccgagccccuucc    | agggcagcuccgagccccuucccgagcaccaggggcgaggagcugccccgu                                |
| new-gga-miRNA-39 | uuuggcagcagcacaauuugcu    | caauuauugugagugccaauu     | uuuggcagcagcacaauuugcuuugcuuauuguguuuugagcaauuugugagugccaauu                       |
| new-gga-miRNA-40 | ccgggcaggggcgagcugagc     | cccggccccgcccgccccgc      | ccgggcagggcgcccgccccgcccgccacagugccggcgagggcgccgagcugagc                           |
| new-gga-miRNA-41 | ccggagccucgucucucugugc    | cacagaggggcgcgggcccaac    | ccggagccucgucucucugugcagaggcgagcacagaggggcgcgggcccaac                              |
| new-gga-miRNA-42 | ugcgucgugcuccugcacag      | ccugcagggagcgugcgcgcu     | ccugcagggagcgugcgcgcuugcgugcugagccugcgugcugcuccugcacag                             |
| new-gga-miRNA-43 | aggcagauuugaaguggaugag    | ucacugcucucucugccccag     | aggcagauuugaaguggaugaggguccguuuucacugcucucucugccccag                               |
| new-gga-miRNA-44 | ugcacgaggauggggcuauu      | agagcacacaccagcugcaca     | agagcacacaccagcugcacaacagcgagcagcaggaugugggcuauu                                   |
| new-gga-miRNA-45 | ucaaugagagcagcugucgcc     | cagaccucgaaccuauugcca     | ucaaugagagcagcugccuuaugggacacagagcgaggcagaccucgaaccuauugcca                        |
| new-gga-miRNA-46 | guucagggucagcagcugggc     | ucagugcugugcucagacccc     | ucagugcugugcucagaccccgguagggguuagggguucagggucagcagcugggc                           |
| new-gga-miRNA-47 | ugacaccgugugcugccccag     | cuggggggcuaggguugcccu     | cuggggggcuaggguugcccuugggugugugcagugugagugacaccgugugcugccccag                      |
| new-gga-miRNA-48 | cgcgaggguuuccgcgcu        | ccgcgagggaagccucggcca     | ccgcgagggaagccucggcgagcaaccggcgagcagggcuuccgcgcu                                   |
| new-gga-miRNA-49 | ucugucacugcucuuugcagg     | cugugagagucagauaa         | cugugagagucagauaagccagagccugaguucaaacucugcagcugcucuuugcagg                         |
| new-gga-miRNA-50 | ugcaccucgugcugcgggccc     | agccucagcugcuaagcgau      | agccucagcugcuaagcgauuggugagaggccauuuccaugcaccucgugcugcgggccc                       |
| new-gga-miRNA-51 | agcuugcgugcugaggagacu     | agucccuuuaaccaagcccu      | agucccuuuaaccaagcccuugagacaaccaagcugugcugcugaggagacu                               |
| new-gga-miRNA-52 | uuuccggaaccgcuucgguc      | ccaaggugggcugcggaacuga    | uuuccggaaccgcuucggugcgggugucugcgagaccaaggugggcugcggaacuga                          |
| new-gga-miRNA-53 | ccccauugggaccccaaug       | auugggacccacugacccc       | ccccauugggaccccaaugaccccauugggaccccauagggaccccauagaucccauugggacccacugacccc         |
| new-gga-miRNA-54 | guggagagcauuagacuga       | ggaggugcgugugcagugug      | gaggugcgugugcagugugagaggagugggagagcauuagacuga                                      |
| new-gga-miRNA-55 | cugggaggggcaucgcgagg      | ccgcgcagcccgccgagcg       | ccgcgcagcccgccgagcgcuuagucaccgugcugggaggggcaucgcgagg                               |
| new-gga-miRNA-56 | gacuccguggaugaaggac       | gcuucacuccacuuaaauug      | gcuucacuccacuuaaauugguuagguagcagagacagcuccgguggaugaaggac                           |
| new-gga-miRNA-57 | ucucuauagggucuaugggg      | cuaugggggucuaugggg        | cuauggggucuauggggucuauggggucuauggggucuauggggucuauggggucuaugggguc                   |

|                   |                         |                          |                                                                              |
|-------------------|-------------------------|--------------------------|------------------------------------------------------------------------------|
| new-gga-miRNA-58  | cggacccccguaccgcgacccc  | gucgcggcucggggauccgccc   | gucgcggcucggggauccgcccuguaacagaguaggcgggcggaaccccguaccgcgacccc               |
| new-gga-miRNA-59  | cgacacccccgugacagccgu   | ggggugcggccgggugucggugug | cgacacccccgugacagccgugguccucagauugcgggugcggccgggugucggugug                   |
| new-gga-miRNA-60  | ccccgcggcugcggugccggc   | cggcgcugagcucggcgugggcg  | ccccgcggcugcgguugccggcgguugugcgguugcgggcgugagcucggcgugggcggu                 |
| new-gga-miRNA-61  | uuucacucucagcaggucuccg  | ugccugcugugagugaaauugu   | ugccugcugugagugaaauugucugagcuggugccgacuuaucaauuacacucucagcaggcuccgc          |
| new-gga-miRNA-62  | ccccgcgucgucgugccccgc   | aggggcacguccgcgucggggc   | aggggcacguccgcgucggggcgagugugucaccgacccccgcgucgugccccgc                      |
| new-gga-miRNA-63  | ugcggaaccugcgccgcgcgcac | aagcgcgagcgguugggccgc    | aagcgcgagcgguugggcgcaacgagcuaaccggcugcggaaccugggccgcgcgcac                   |
| new-gga-miRNA-64  | ugugcccacgcagacguacugc  | cagaugucugcgugugccucugu  | cagaugucugcgugugccucugugcauacauuuuacaugugcccacgcagacguacugc                  |
| new-gga-miRNA-65  | ugugcugaggacuccacauuc   | ugaggguuuaccagcacugagu   | ugugcugaggacuccacauuggacgcagugcuccaggugagguuuuaccagcacugagu                  |
| new-gga-miRNA-66  | cagcgucgggcagugcacugc   | agugcagucuguugcagcguggc  | agugcagucuguugcagcguggcagcuacguuugcuccugcagcgugggcagugcacugc                 |
| new-gga-miRNA-67  | ugccucuugucuaucugcaga   | gugcagguaggcagggggagcag  | gugcagguaggcagggggagcagcagcugugugcugguuugccuaccgucgccuuuugucuaucugcaga       |
| new-gga-miRNA-68  | ugaaccccccgacuccguagg   | ggcggggucugggggcucucagc  | ggcggggucugggggcucucagggguuagggggagagccuugaugcagcccgaaaccccccgacuccguagg     |
| new-gga-miRNA-69  | accuaggcuguaagacguuuac  | uaacaaucuaaaggccaggucg   | accuaggcuguaagacguuuaccccccgagcagacaguaacaaucuaaaggccaggucg                  |
| new-gga-miRNA-70  | ccuccgcaccgcccuuagccc   | cguugcgggcgucgucgggagccc | ccuccgcaccgcccuuagcccgcgcagcggggcgguugcgugcugggagcugcgggcgucgcgggagccc       |
| new-gga-miRNA-71  | cuccgcggggggcgggccc     | gcccgcucagcgccgcggc      | cuccgcggggggcgggcccccgcgcgcucagcggccgcggc                                    |
| new-gga-miRNA-72  | uugguggcugcaugcucacgc   | ugagggcagagcugcagccuca   | ugagggcagagcugcagccucacauuucuuuuuuguggacuggguggcugcaugcucacgc                |
| new-gga-miRNA-73  | ucacagcccuuccgcccccu    | uggggcugcagggucgggagau   | uggggcugcagggucgggagauguggggcucugcagcccccugcacaucacagcccuuccgcccccu          |
| new-gga-miRNA-74  | uucuccuccuucgcagcgcg    | ugccggggcgugggggaggggca  | ugccggggcgugggggaggggcagcuccccuugcugccucucuccuccuucgcagcgcg                  |
| new-gga-miRNA-75  | ugcugugggcucugcucacc    | ggugggcagcaccucgggcaug   | ggugggcagcaccucgggcaugggcgucugccucugcugggcucugcucacc                         |
| new-gga-miRNA-76  | cggagucgggcagcucucagc   | cggagcucucggcgcgcccgcu   | cggagucgggcagcucucagcagcaguuugguaggcgggagcucucggcgcgcccgcu                   |
| new-gga-miRNA-77  | gcgugggagucugugugggc    | ggcgcgacgaucccaggggcgug  | ggcgcgacgaucccaggggcgugugagcuccgugcagcgugggagucguguguggc                     |
| new-gga-miRNA-78  | ccccgagcgaacccggagggg   | cgcuccggggucguacuacaga   | cgcuccggggucguacuacagaccuuggucagcacaagccccgagcgaacccggagggg                  |
| new-gga-miRNA-79  | ugcgcacacgcgcggcugaag   | gcuvgggacgcgcugcgcgac    | gcuvgggacgcgcugcgcgacgcuuuguaagcucagguugugcgcacacgcgcggccugaag               |
| new-gga-miRNA-80  | caccgcucgccuucggcgcc    | agucgcagggcgagcgucgc     | agucgcagggcgagcgucgcgcuccaaccacacgcaccgcuucgcuucggcgcc                       |
| new-gga-miRNA-81  | ccacucugugugcugcccacc   | ggggaggccgcagugcagggc    | ggggaggccgcagugcagggcgaagacaacugccacucugugcugcccacc                          |
| new-gga-miRNA-82  | uggcagggaugacacugagcu   | aagcucagggucguacuuuucc   | uggcagggaugacacugagcugcgugggucccauuuuuccauugaaugaggcucagggucguacuuuuccacuccu |
| new-gga-miRNA-83  | uccucguaccgucgcagccucu  | acgcgucucgcugcaggggg     | acgcgucucgcugcaggggcgggccgcagauugcugagcuccuguaaccgucgcgaccucu                |
| new-gga-miRNA-84  | ccgagcgagcucugcagagccu  | cugucugcaggggcucgccaucc  | cugucugcaggggcucuccaucccugugcugcaaggccgagcgagcucugcagagccu                   |
| new-gga-miRNA-85  | ugcggaagcgcgaggcugca    | ugcgccucgcccucuuuacc     | ugcgccucgcccucuuaccagugccgguaggugcggaaggcgaggcgugca                          |
| new-gga-miRNA-86  | ccccagaccaggagugacgg    | ugacaucgguguguuugguauug  | ugacaucgguguguuugguauugcuguuuugauuuccacccagacccaggagucagg                    |
| new-gga-miRNA-87  | uagggccaggcugggucacccac | agcugggccaccucgcccuccug  | agcugggccaccucgcccuccugcuccacccugcagguaaggccaaggcugggucacccac                |
| new-gga-miRNA-88  | ccgucgcccugcccagcgucg   | agcccgugggugacagcgcagcg  | ccgucgcccugcccagcgucggcgugcccugcccagcgugggugacagcgcgagcu                     |
| new-gga-miRNA-89  | ucagccgucugcagccuccu    | auggcugugagugcgcgugagg   | auggcugugagugcgcgugaggugucagagcauccuccagccgucugcagccuccu                     |
| new-gga-miRNA-90  | aaccaccucaguuuuuucc     | caggaaacaucugaagugaau    | aaccaccucaguuuuuccauuuccuuaaagcaggcaggaaacaucugaagugaau                      |
| new-gga-miRNA-91  | acaucaacucuuacugucggg   | cggcaguaaggagcucacaugc   | cggcaguaaggagcucacauagcggucgucgcccgcacaucaacucuuacugucggg                    |
| new-gga-miRNA-92  | gaagugucacacucagggcucu  | agccugugggugagggccuuc    | agccugugggugagggccuucugcucaacucuaagaagugucacacucagggcucu                     |
| new-gga-miRNA-93  | ccgcggcgccgagacccccgc   | ggcggcuccuccugcgucaggug  | ggcggcuccuccugcgucaggugcgggccucagagcuccggcccgccggcgagacccccgc                |
| new-gga-miRNA-94  | caucuuaggauauaagguaaccg | guaccugcaccccaagaugacu   | caucuuaggauauaagguaaccuagaagggugcagcagguaaccugcaccccaagaugacu                |
| new-gga-miRNA-95  | cugaaacagucugcaccaccagg | cugggggcacaaucugugcugu   | cugggggcacaaucugugcucuaacagacccaagcugaaacagucugcaccaccagg                    |
| new-gga-miRNA-96  | uaagcaugguauuucugaggg   | ccucacagaaauaccaugcuua   | ccucacagaaauaccaugcuuaugaaacaaguuccauuaauuaagcaugguauuucugaggg               |
| new-gga-miRNA-97  | aaaccuauccaugacaggggau  | cccucugccuugggcaggguugcg | cccucugccuugggcaggguugcgaauugagugguugggcaaccuauccaugacaggggau                |
| new-gga-miRNA-98  | ccagaacacugcgcaucgaccc  | gucgaugcgagugcuguggguc   | gucgaugcgagugcugugggucauggaugagagaugaccaagacacugcgcaucgaccc                  |
| new-gga-miRNA-99  | uauggcaaggaggcugcagacc  | accugcgauccucgcuuuga     | uauggcaaggaggcugcagaccuuccucuccacugaggcugcgaucuccugcuuuga                    |
| new-gga-miRNA-100 | ugcagcgcuuccuguggguccu  | cucucggggcgcgucguccu     | ugcagcgcuuccuguggguccuugaccuuccucgagggcucugggggcgcguguccu                    |
| new-gga-miRNA-101 | cugagccuucuguccucgaga   | cagcagggaugggggcagugc    | cagcagggaugggggcagugcgggcccgugugcugagccuucuguccucgaga                        |
| new-gga-miRNA-102 | ccugggggcacgucggggucg   | gaccccgcgagggccgcagcg    | ccugggggcacgucggggucggaccgucggccuccauccccgaccccgcgagggccgcagcg               |
| new-gga-miRNA-103 | uaugauucuaacgauuccucag  | gagggaaucuaagaaucauau    | gagggaaucuaagaaucauauugagaauacagagauaugauuacgauuccucag                       |
| new-gga-miRNA-104 | agcggacaaaggacgaugggc   | ugccaucguccuuuguccgucg   | agcggacaaaggacgaugggcacacgaagucucugggagccugagcaguucaugugccaucguccuuuguccgucg |
| new-gga-miRNA-105 | cugugacauucugucccagc    | uuggggaaaggagguaguggc    | uuggggaaaggagguaguggcacacucugggcagcugcugacauucugucccagc                      |
| new-gga-miRNA-106 | ugccugcuguccucacuugc    | uaaauagaacaguuugggcu     | uaaauagaacaguuugggcuuuggaugugaaaaagugcucugccugcuguccucacuugc                 |
| new-gga-miRNA-107 | ugcuuucgucugcugugggga   | uugcgagcgggcugacugagcg   | uugcgagcgggcugacugagcgcgucguuucugcugcuuucgucugcugugggga                      |
| new-gga-miRNA-108 | ccgggucgcgggaccgccagc   | ggggcgggugaggggccgggug   | ccgggucgcgggaccgccagcugcgagcgcggggaaggggcgggugaggggccgggug                   |
| new-gga-miRNA-109 | ucagagagccccagccaaug    | uugggucggggauuccucgc     | ucagagagccccagccaaugugcagugcuguccguugggcugggggauccucgc                       |
| new-gga-miRNA-110 | auauguagcuuccuauaucucc  | aagauagauugggcuuaccuagc  | aagauagauugggcuuaccuagcuuaaccuagaugauaugcucuccuauaucuccu                     |
| new-gga-miRNA-111 | ucuggcuuagggucguccauc   | cggcgcagagcccgugccguggc  | cggcgcagagcccgugccguggguguucaacacuccucugggcuuagggucguccauc                   |
| new-gga-miRNA-112 | cggccauugcuaaggcgagcguc | cgcccgcguguaauggcagca    | cggccauugcuaaggcgagcugccgcggagucgucggccgcgcggcgcuuaauggcagca                 |
| new-gga-miRNA-113 | ccgcccggagcugcgggugcg   | guccccagaccggcgccgc      | guccccagaccggcgccggggccaccagcgagcgggcgccggagcugcgggugcg                      |
| new-gga-miRNA-114 | aaugcuuacuuugucgacaga   | agcccagacaaguugaguauuu   | agcccagacaaguugaguauuuuuccuccucgccaauuggauguguaaugcuuacuuugucgacaga          |
| new-gga-miRNA-115 | cugcuccucccgugcugcugc   | cgacgacgcaggagagccgag    | cgacgacgcaggagagccgagcacauggaacacucugcuccucccgugcugcugc                      |

new-gga-miRNA-11f acuccaccuccuguuugguuuug auaccauucugaggugugucugu acuccaccuccuguuugguuuugguuuuuuauagaaucauuugauaccauucugaggugugucugu  
new-gga-miRNA-11f aggcugcagaccacauauuucccu ggacauugugaggugggaccuuu aggcugcagaccacauauuuccuccuuuuuauacagggacauugaggguuugggaccuuu  
new-gga-miRNA-11f ucuggaauguuuuauagugaggcu ucuaaccuaauaacaauucugaug ucuggaauguuuuauagugaggcugagcuuuauaggguaccuuauaacaauucugaug  
new-gga-miRNA-11f ucacggugggggaugguagaucug ugauccucuguccuccuccugca ucacggugggggaugguagaucugcagcagauugauuccucuguccuccuccugca  
new-gga-miRNA-12f ucaagcaugggagacagcagacacu ugugcugcucuccaugccugaaa ucaagcaugggagacagcagacacuugucagcaguuugugcugcucuccaugccugaaa  
new-gga-miRNA-12f ucaagaacaaagcaugugggcu agcacugcacuguuucucugagg ucaagaacaaagcaugugggccuauuuuugcagaaaaagcagcugcucuguuucugagg  
new-gga-miRNA-12f caacacugauuacugccucgag cuggggugugagggcagugg cuggggugugagggcagugggcugcucuuuggaugggugcaacacugauacuugggccucgag  
new-gga-miRNA-12f agugcaaaauagaauauaggga auugauuauuuuugcucucuu auugauuauuuuugcucuuauauaagaggaggaugcaaaauuagaauauaggga  
new-gga-miRNA-12f ccaucuccaccagcagcacugu cagugccgacugugggggaugcg cagugccgacugugggggaugcgccguggggagagcccauuccaccagcagcacugu  
new-gga-miRNA-12f ugucuggggucgcagugaugua uacagcacugcuuuccacaac ugucuggggucgcagugauguagauagacagauuugaccuuacagcacugcuuuccacaac  
new-gga-miRNA-12f caccacugugcgcgaauauaggc agauaucgcgaauugugaggcgcu agauaucgcgaauugugaggcgucacaauaauacagcugucacacauugcaccacugugcgcgaauauaggc  
new-gga-miRNA-12f gugaggcgcgggcuggggacgcg cgcccgcgcgccucacgccc gugaggcgcgcgugcgggacgcgcgcaucuccgcccccgcgcccgcgccgcccacgccc  
new-gga-miRNA-12f guggcgcgccggcgugggc cgccggggggcgcgcgcg cgccggggggcgcgcgcgcggggagagaccugagaaggaacugugcgcgccggcgcgggcg  
new-gga-miRNA-12f guccucgcccgcgugcgggc gcgcgugcgccgugugggggcg cgcgugcgccgugugggggcgcccgcgugcccgcccgcgcgugcgggc  
new-gga-miRNA-13f agcuggugggcgaggcacacagagi cugcgccucccccacauuugc agcuggugggcgaggcacacagagugggcaguuuugcuuugccugcacugcgccucccccacauuugc  
new-gga-miRNA-13f uacggcgaggggaagaaua ucugcuuugcugucccgucucc uacggcgaggggaagaagaauagugcgaaggguuucugcuuugcugucccgucucc  
new-gga-miRNA-13f ucugaccuucucuuguauu aucaaaugaaagguaagaau aucaaaugaaagguaagaauuuuagucagggguugagcugaccuucucuuguauu  
new-gga-miRNA-13f cacucgcccagcucugugugu cccagagccauggcccagggca cccagagccauggcccagggagcagcuauucugcucgcccagcucugugugu  
new-gga-miRNA-13f cauugggugugacguuacuuagu uaaguuacguuagaacagccuagugcugccuguuagcagucuuugggugugcagcuuaguu  
new-gga-miRNA-13f cgggcgggagguccggcg cgggcgggcgggcgugcg cgggcgggcgggcgugcgcgggcgcuuagugugacgagugcugugcgggcgagcgggcgggagguccggcg  
new-gga-miRNA-13f cugccugaccuggaugauacgu agagacaccagcucagggcuug cugccugaccuggaugauacgucugcugugagcccaucagagacaccagcucagggcuug  
new-gga-miRNA-13f cccuagggagcugugggcgac ccggcaccaacgucacugugucc ccggcaccaacgucacuguguccauugcagcuguccugccuagggagcugugggcgac  
new-gga-miRNA-13f uguuuccugcuagaucgagccag auauacgucaguuaggcaccggg uguccugcuagaucgagccaguuuagaaauagaaucagauauacgucaguuaggcaccggga  
new-gga-miRNA-13f guaauguccuccgggugugggg ccgacccugagauugcucacagg guaauguccuccggguguggggugcgugcccgccacccugagauugcucacagg  
new-gga-miRNA-14f ggggugcaccagugucauuggc ucagugacaccugugcaaucc ucagugacaccugugcaauccaccugaaaggcucuggggugcaccagugucauuggc  
new-gga-miRNA-14f ucaggaggugcugcacaugacu ucuuuuguggggcuuaccuuga ucuuuuguggggcuuaccuugagggagauagucacucaggaggugcugcacaugacu  
new-gga-miRNA-14f auaccaaggcugggugugcugaga ggagcagccagcuuugggauggg auaccaaggcugggugcugugagagccacaugcagaucgagcagccagcuuugggauggggc  
new-gga-miRNA-14f accuggcugagggcgucacugc acugcagcccuugccagacu acugcagcccuugccagacugcgggguguaaccuggcugagggcgucacugc  
new-gga-miRNA-14f ucagccugggcagcgccccaagu gcagggcuugcgccaggcuuacg gcagggcuugcgccaggcuuacggucagugaguccauuggucagccugggcacggccccaagu  
new-gga-miRNA-14f agccagccagcugcucacgc agagcagagcuggagcugauugc agagcagagcugggagcugauugcuuugcagccagccagcucugcucagc  
new-gga-miRNA-14f ggcugagcugcgcgcuuuccu gaagcaccgcuugcuuuccug ggcugagcugcgcgcuuuccuugcuuuguguaacggggaagcaccgcuugcuuuccug  
new-gga-miRNA-14f uuguagcaagguggcugacu ucagagccagcuuguuacaagc ucagagccagcuuguuacaagcuugagccaguuugagcaagcuggcugacu  
new-gga-miRNA-14f uacugcgugcuguccacggccguuauuccaaccgggcuuugagcagacagcucugcgcg ucugcgugcuguccacggccguuauuccaaccgggcuuugagcagacagcucugcgcg  
new-gga-miRNA-14f aggcagagcucugugggcagag cagccacuggagcucuccuugug cagccacuggagcucuccuugug cagccacuggagcucuccuugaggaugaauggcacucaggcagagcucugugggcagag  
new-gga-miRNA-15f cugaugugugagcgugugcacu ugcccuguccacgcucaagg cugaugugugagcgugugcacugggaucuauggaagugcccuguccacgcucaagg  
new-gga-miRNA-15f accgccccgccccggcguc ugucgggggucggggcagugc ugucgggggagucggggcagugcccggggaucuuuuguaaccgccccgccccggcguc  
new-gga-miRNA-15f ucagugcucugagccccagc uggggugagggcuuagugugagc uggggugagggcuuaguguggagcugucuuaccugcugcucagcugcucugagccccagc  
new-gga-miRNA-15f cuuccaggauguuuggaguc acuaaccaagcuuugggaaauu acuaaccaagcuuugggaaauuuuauuauuacuaaagcuuccaggauguuuggaguc  
new-gga-miRNA-15f uauggggcugccagugggggcgccg cccccuuccagcccuauaaa uauggggcugccagugggggcggaugcugggagccgcccccccuuccagcccuauaaa  
new-gga-miRNA-15f agccugcugagagugaaauuga aaauucacucacagcaggcacuu agccugcugagagugaaauugauaaagugcggcaccagcucagacaaauucacucacagcaggcacuu  
new-gga-miRNA-15f aaaggcgagugcugcagugcu ugucgagagcuguaagaccugcu ugucgagagcuguaagaccugcugggaaucuuuguccagaaaggcgagugcugcagugcu  
new-gga-miRNA-15f cugcccgcgcgcccgccgcccgc cgccggugcgcgcgggcaac cugcccgcgcgcccgcgcgcgaggcgcgccggugcgcgcgggcaac  
new-gga-miRNA-15f agaagagcauuuaauugugc acacauuucagugcuuccugaa agaagagcauuuaauugugcuuacaacgaacacacauuucagugcuuccugaa  
new-gga-miRNA-15f uacagccggagcugagggugc ugccugcaccgcccugugc ugccugcaccgcccugugcuuugggcugugccuauuuuguaacagccggagcugagggugc  
new-gga-miRNA-16f caggggaguuugggugccucagc ucacgggcccccauucccuagc caggggaguuugggugccucagcacaugacccccugcucacggcccuuccaaucccuagc  
new-gga-miRNA-16f uuccuuaccuucuuugcaguacuc uacuguggagagugugauaaa uuccuuaccuucuuugcaguacuccagucuuuuaaguuacuguggagagugugauaaa  
new-gga-miRNA-16f ccccaugguccauggauggaug ccccaugguccauggggaugggcu ccccaugguccauggauggaugcuuuccaugcuguaucucccaugguccaugggagggcu  
new-gga-miRNA-16f cgccgcuuccuuaccguuaaccu gugcgggcgaggcgugccc gugcgggcgaggcgugcccugcugcugcgagggcgccgcuuccuuaccguuaaccu  
new-gga-miRNA-16f cuacugcagugcuggaugccugc agggccccugcagagcagugg cuacugcagugcuggaugccugggguacuuggcuuaccagggccccugcagagcagugg  
new-gga-miRNA-16f uagggagaaaugugaagcagcu cugcuacucuuuucccuaga uagggagaaaugugaagcagcuuaggagcaguguaaaacuaauucucugcuacucuuuucccuaga  
new-gga-miRNA-16f gaagagguccaggcugagccac agcuuagccugugucuguuugc agcuuagccugugucuguuugcaguuuaggacaugaaggguccaggcugagccac  
new-gga-miRNA-16f uuggguggagcgguuaggacuaga uuuccaaccuucucccccu uuggguggagcgguuaggacuagguuugagugguuuuuccaaccuucucccccu  
new-gga-miRNA-16f uuuguccuccauuguuucc agacacauggagcgaaaggacaag agacacauggagcgaaaggacaagagacauuuggaccccuuuguccuccauuguuucc  
new-gga-miRNA-16f cacuguauggugcuguaacgcaug gggugcagcaccuacagugug cacuguauggugcuguaacgcaugggcaggaaggagcagugggugcagcaccuacagugug  
new-gga-miRNA-17f cgccggcgcgcgccacccgc gugggugcugcgcgcccgccc gugggugcugcgcgcccgcccuccccccggcgaggggugcgggcgcgcgccacccgc  
new-gga-miRNA-17f acugaugacagagcauuugccu agcugugcucuguccucaguu agcugugcucuguccucaguuucuggauguuuuauucgucgcaauguacugaugacagagcauuugccu  
new-gga-miRNA-17f cuggggagaauugucuccuucuu agugggcauauucccuucc cuggggagaauugucuccuucugauaugccgugauugcagugggcauauucccuucc  
new-gga-miRNA-17f aagcugcugcccuguuacggug ccugccacgugcgcgccucc aagcugcugcccuguuacggugcucucgacacacguguuugcagcgccgcccacgugcgcgccucc

|                   |                           |                          |                                                                                  |
|-------------------|---------------------------|--------------------------|----------------------------------------------------------------------------------|
| new-gga-miRNA-174 | uccagcauuuacgcagcgugacugc | agcaccuccuuagugcugggaa   | uccagcauuuacgcagcgugacugcagcuggaaucuccugcagcaccuccuuagugcugggaa                  |
| new-gga-miRNA-175 | uaggaacuuuccucgggaggu     | ccucacagcuauuuggaaguuccc | uaggaacuuuccucgggagguugcauuuuuuuuccucacagcuauuuggaaguuccc                        |
| new-gga-miRNA-176 | caggccgcgugugugcgcac      | ugcgcgccgcguguccagc      | caggccgcgugugugcgcacaccugagcguaacaaacugcgcgacgcguguccagc                         |
| new-gga-miRNA-177 | ccagcugucgucgucgucggg     | ugggcugcagagccaagcagcug  | ugggcugcagagccaagcagcugaugggugagaacagccccagcugucgucgucgucggg                     |
| new-gga-miRNA-178 | ucucacugcuccucuuccucaga   | ggggguguggggagcaugggg    | ggggguguggggagcauggggucagggcugcacaguccucacugcuccucuuccucaga                      |
| new-gga-miRNA-179 | uacaucacgugggugugcguc     | cgucacuauugucacgugggugug | uacaucacgugggugugcgucgugaugucacgugggugugacgucacuauugucacgugggugug                |
| new-gga-miRNA-180 | uugggcugggcuugcugcgug     | acgcugcugacccagccacgu    | acgcugcugacccagccacguuccacccuuugcuuuggguuugggcugggcuugcugcgug                    |
| new-gga-miRNA-181 | uucucagguuagacaguccug     | caugggcugacgaaccugagau   | caugggcugacgaaccugagauugaccucauguuuacacauuucacagguuagacaguccug                   |
| new-gga-miRNA-182 | cugaggcgucuccugcauccc     | cagggagcgccucagcagccc    | cugaggcgucuccugcaucccugcuugcgggauccucgugggauagcaggagcgccucagcagccc               |
| new-gga-miRNA-183 | cguccgcgcccgcagggaccgu    | uccgcgggugcgggagcgucua   | cguccgcgcccgcagggaccgucagagaagcgguuccgcggugcgggagcgcgucua                        |
| new-gga-miRNA-184 | cacgccgggagcagcgaggcg     | cucgcugcaucccgcguaacc    | cacgccgggagcagcgaggcgcuuccgcucgucgcaucccgcguaacc                                 |
| new-gga-miRNA-185 | cugcguaaccgugggugaugua    | gacauaccagcgggcgggcacu   | gacauaccagcgggcgggcacuauagccacuggggggagugcugcguaaccgugggugauguacu                |
| new-gga-miRNA-186 | ucagcaccuccugucccgaguc    | cgggggcgcggggugcugagc    | cgggggcgcggggugcugagcgguccuuuggggucucucccgcgugggccucccccgcgagcaccucccgucggcgaguc |
| new-gga-miRNA-187 | aacgaaaucccgaggcagcug     | ugcuuuugggauuccguugccc   | aacgaaaucccgaggcagcugggcgugcggggagcagcugcuuuugggauuccguugccc                     |
| new-gga-miRNA-188 | guccaguuuucccgaaaucccu    | auuccuggaaauacuguuuu     | guccaguuuucccgaaaucccuuaggcgcuacguuugggauucccgaaauacuguuuu                       |
| new-gga-miRNA-189 | augugcguuagucaguggcua     | uuagccgcugucacacgcaca    | uuagccgcugucacacgcacagugggagucgcccagagcacaauugcguuagucaguggcua                   |
| new-gga-miRNA-190 | cucaugccucucuguccagg      | ucugggcacaaagaggcgagug   | ucugggcacaaagaggcgagugggagcagggagagccucaugccucucuguccagg                         |
| new-gga-miRNA-191 | ugcgcuuucucuccggcagc      | uugggauaggauugugcugcac   | uugggauaggauugugcugcacugcccagcucugaugcgcgugcgcuuucucuccggcagc                    |
| new-gga-miRNA-192 | cugcuggagcugcuccugguug    | cuggagcugcuccugguugcacu  | cuggagcugcuccugguugcacucagucugcuccugugcugcuggagcugcuccugguug                     |
| new-gga-miRNA-193 | uugcagaccaccgaugagaac     | uuucucaucggugugcugcag    | uugcagaccaccgaugagaacggaaagauuccuuuucucaucggugugugcugcaga                        |
| new-gga-miRNA-194 | ucuggcugcucagugcucugcu    | agcaggagcacugggugacgag   | agcaggagcacugggugacgagagccucgcacagcucuggcugcucagugcucugcu                        |
| new-gga-miRNA-195 | uuucggcuguuuccggcgacug    | uuccggaaauccggaaagcgag   | uuccggaaauccggaaagcgagccgagccgacgcugccauuucuguuuccggcuguuuccggcgacug             |
| new-gga-miRNA-196 | uguaucugagaaccucacucug    | ugaggucucaccagugcagagc   | uguaucugagaaccucacucuggaugcaguaacggagguagugucacaccagugcagagc                     |
| new-gga-miRNA-197 | cacagcgcaucgugggggcuga    | gcaucccgccauaagcucac     | gcaucccgccauaagcucacugagugcccacagcgcaucgugggggcuga                               |
| new-gga-miRNA-198 | ucgguacuggucgguacuggua    | guacugguuuuguacugugucu   | guacugguuuuguacugugucugguuuuauugcuggucgguacugguu                                 |
| new-gga-miRNA-199 | cacacacauauauauaca        | uaauauauugugcauguguguau  | uaauauauugugcauguguguauauauauauuguaauacauauauacacacauauauauaca                   |
| new-gga-miRNA-200 | uuuagugugauaaugcgguug     | aacaccauugucacacuccaua   | uuuagugugauaaugcgguuugauagauuggacacaaacaccauugucacacuccaua                       |
| new-gga-miRNA-201 | cauagugagaaagggaugauuc    | uuccuuuuccuacucuguagaa   | uuccuuuuccuacucuguagauuuucacuguaauuacauaggaagaaagggaugauuc                       |
| new-gga-miRNA-202 | aggugcacaggggcaucugacu    | cucccugaugacaaaauc       | cucccugaugacaaaaucaggugcacaggggccaucugacu                                        |
| new-gga-miRNA-203 | ucgcacugcuguaaccuuuugac   | ugaauaggguccauuccag      | ucgcacugcuguaaccuuuugacagcauuuuccugugaauaggguccauuccag                           |

precursor coordinate  
chr13:8493108..8493164:-  
chr12:11670979..11671039:+  
chr12:11671363..11671426:+  
chr33:1093264..1093324:+  
chr1:843242..843306:-  
chr20:9710469..9710531:+  
chrUn\_NT\_467319v1:10243..10320:-  
chr19:5515026..5515081:+  
chr33:1171914..1171974:+  
chr5:15887078..15887137:+  
chr18:9383535..9383595:+  
chr1\_NT\_456790v1\_random:3306..3391:+  
chr19:5515770..5515834:-  
chr19:5515202..5515261:-  
chr5:21516911..21516976:+  
chr1\_NT\_456305v1\_random:9360..9444:+  
chrW\_NT\_463533v1\_random:23..79:-  
chr8:4658341..4658400:-  
chrUn\_NT\_474180v1:2343..2406:+  
chr2:412762..412823:+  
chr4:63482790..63482853:-  
chr1\_NT\_456560v1\_random:2532..2621:-  
chrZ:16702090..16702149:-  
chr28:662516..662568:+  
chr5:85802..85869:+  
chrUn\_NT\_474236v1:2804..2857:+  
chr4:89099769..89099832:-  
chr22\_NT\_463025v1\_random:5999..6058:-  
chr3:87380940..87381002:+  
chr3:45733506..45733571:+  
chr15:10903030..10903076:+  
chr4:35126567..35126624:-  
chr2:32178060..32178126:-  
chr15:9383953..9383997:-  
chr12:3154776..3154845:+  
chr14:6179802..6179865:-  
chr13:17162740..17162796:-  
chr4:58156674..58156735:-  
chr1:844265..844329:-  
chr1:72122792..72122846:+  
chr10:776513..776571:-  
chr19:86485..86540:+  
chr2\_NT\_457899v1\_random:8716..8773:+  
chr24:4442640..4442696:-  
chr23:1881170..1881233:-  
chr11:17925070..17925127:-  
chr15:28362..28430:-  
chr3:81811344..81811399:+  
chr5:14017742..14017803:-  
chr4:50090806..50090867:-  
chr10:14678610..14678667:-  
chr4:39800704..39800764:-  
chrUn\_NT\_479370v1:1076..1152:-  
chrZ:43054244..43054291:-  
chr3:87201449..87201507:-  
chr26:3076089..3076146:-  
chrUn\_NT\_474824v1:4149..4250:-

chr2:31320562..31320623:+  
chr33:1576506..1576565:-  
chr18:6449723..6449784:+  
chr1:144520190..144520259:+  
chr3:110315775..110315834:+  
chr2:115487968..115488028:+  
chr21:3969023..3969082:-  
chr11:18806839..18806899:+  
chr3:105077421..105077483:-  
chr3:30349125..30349194:+  
chrUn\_NT\_464587v1:10306..10377:-  
chr19:5515205..5515264:+  
chr9:4696186..4696259:+  
chr4:43046174..43046215:+  
chr19:7378734..7378798:+  
chrUn\_NT\_464201v1:17930..17997:+  
chr8:28362266..28362331:-  
chr4:5200274..5200327:+  
chr27:4778500..4778559:+  
chr25:2556624..2556683:+  
chr2:62161165..62161226:+  
chrUn\_NT\_477504v1:1263..1324:-  
chr20:11274922..11274978:-  
chr10:17093538..17093593:+  
chr4:60454305..60454388:-  
chr9:10684842..10684905:+  
chr8:7496343..7496401:+  
chr19:4883279..4883334:+  
chr13:13593415..13593475:+  
chr21:621901..621963:-  
chr4:25598798..25598859:+  
chr3:96912434..96912493:-  
chr8:24660322..24660381:+  
chr19:5515021..5515080:-  
chrZ:43198296..43198356:+  
chrUn\_NT\_471281v1:4376..4440:-  
chr2:145259936..145259997:-  
chr15:10062034..10062093:-  
chr2:60473961..60474026:-  
chr2:147405012..147405073:-  
chr18:2872432..2872494:+  
chr25:1578295..1578357:-  
chr24:290173..290233:+  
chr15:10874914..10874969:+  
chr3:104943602..104943669:+  
chr2:115940207..115940268:-  
chr12:5317530..5317608:+  
chr15:7128431..7128491:+  
chr1:96374526..96374588:+  
chr2:111558033..111558093:-  
chr19:4311319..4311381:-  
chr13:2583452..2583509:+  
chr4:81134340..81134400:-  
chr10:19224975..19225037:-  
chr2:44942265..44942325:-  
chr12:11670237..11670299:+  
chr28:3936705..3936775:+  
chr1:142053..142113:+

chr4:275566..275629:-  
chr22:2664364..2664422:+  
chr19:6035263..6035321:+  
chr4:90158100..90158155:-  
chr13:14454465..14454522:-  
chr28:1588180..1588243:-  
chr21:580202..580267:+  
chr19:8077899..8077957:+  
chr17:1481029..1481088:+  
chr5:18631105..18631169:-  
chrUn\_NT\_476753v1:1940..2010:+  
chr15:743032..743093:+  
chrZ:18071582..18071657:+  
chr19:9118371..9118429:+  
chr10:17093528..17093596:-  
chr3:59496755..59496812:-  
chr1:50452618..50452677:-  
chr24:4180002..4180060:+  
chr4:60872218..60872279:-  
chr1\_NT\_456372v1\_random:327..407:+  
chr4:292851..292913:+  
chrZ:1191599..1191662:+  
chrZ:41649935..41649998:-  
chrUn\_NT\_468272v1:5616..5676:+  
chr4:74238850..74238906:+  
chr1:62218231..62218290:-  
chr18:9969045..9969109:-  
chr19:7286198..7286251:-  
chr11:17833758..17833821:-  
chr14:4515271..4515322:+  
chr4:3569339..3569398:-  
chr1:177088318..177088373:-  
chr12:2189087..2189149:-  
chr3:109826725..109826791:+  
chr1:120628360..120628419:-  
chr3:30865630..30865690:+  
chr12:9880189..9880252:+  
chr4:63482793..63482855:+  
chrUn\_NT\_465998v1:7388..7449:-  
chr1:144520186..144520254:-  
chr20:8554637..8554698:+  
chr4:77944504..77944556:+  
chr1:168016562..168016620:-  
chr4:1044199..1044262:-  
chr20:10257577..10257638:+  
chr3:26170237..26170295:-  
chr27:4527663..4527725:-  
chr3:51316645..51316705:+  
chr12:19390016..19390077:-  
chr3:42183113..42183188:+  
chr10:15334895..15334953:-  
chr21:5006615..5006673:-  
chr28:29061..29123:-  
chr20:9815103..9815165:-  
chr5:11706170..11706232:-  
chrZ:78517883..78517952:-  
chr13:8512966..8513027:-  
chr28:3078580..3078652:+

chr23:5238151..5238212:-  
chr1:22959266..22959325:-  
chrUn\_NT\_477504v1:1267..1325:+  
chr17:7275426..7275489:-  
chr27:5284831..5284897:-  
chrUn\_NT\_469680v1:596..660:+  
chr2:926178..926242:-  
chr20:9710466..9710529:-  
chr18:3536305..3536371:+  
chr5:17593195..17593251:+  
chrUn\_NT\_465151v1:2038..2089:-  
chrUn\_NT\_472355v1:309..377:+  
chr10:1255074..1255158:+  
chr12:11670975..11671035:-  
chr13:8492496..8492557:-  
chr5:15887075..15887138:-  
chr10:20135923..20135981:-  
chr23:1281695..1281758:+  
chr27:4542764..4542826:-  
chr10:14704761..14704820:-  
chr32:15532..15590:+  
chr2:32251637..32251703:-  
chr27:512934..512994:+  
chr27:5200919..5200977:-  
chrUn\_NT\_472922v1:3667..3726:+  
chr11:7747549..7747609:+  
chrW:2525199..2525257:+  
chrZ:40033855..40033916:-  
chr5:23428240..23428281:+  
chr5:13119888..13119943:+



| new_name         | consensus mature sequence | consensus star sequence   | consensus precursor sequence                                                         |
|------------------|---------------------------|---------------------------|--------------------------------------------------------------------------------------|
| new-gga-miRNA-1  | ugagaugaagcacugacugcgcg   | ggugcgagugcugcaucucuggguc | ggugcgagugcugcaucucugggucaauugggagucugagaugaagcacugacugcgcg                          |
| new-gga-miRNA-2  | caacggaaucccaaaagcagcug   | cugcccgugggaauucguuacc    | caacggaaucccaaaagcagcugucccgagcgcccgagcugcccguggaauucguuacc                          |
| new-gga-miRNA-3  | aaugacacgacucacuccgcugagc | caucgggggaugucgugucugucc  | aaugacacgacucacuccgcugagcgcgagccacagagccaucgggggaugucgugucugucc                      |
| new-gga-miRNA-4  | aggacugucuaaaccugagaaau   | aucucagguuucgucagcccauga  | aggacugucuaaaccugagaauggugaaacaugagggucaauucgucagcccauga                             |
| new-gga-miRNA-5  | uaccuguaagacugaaauugu     | caaaucgucucuaaggggaaau    | uaccuguaagacugaaauugugugagcgucuccgagugcgaaauucgucuaaggggaaau                         |
| new-gga-miRNA-6  | aacagauaagauugaugugcg     | ugcaugugagcuccuacugccg    | aacagauaagauugaugugcggaacgagccugcaugugagcuccuacugccg                                 |
| new-gga-miRNA-7  | accguggcuuuagauuguuacu    | uaacagucuaacggccauuggucg  | accguggcuuuagauuguuacugugcugcgggggggaacagucuaacgcaugggucg                            |
| new-gga-miRNA-8  | uccagacucagugauuuuuguug   | aacaauauccugugucugagau    | aacaauauccugugucugagugaguuugcacacagagagacuccagacugauuuuuguug                         |
| new-gga-miRNA-9  | uaacagucuaacagucaugggcu   | accuuggcucuaagacugcuuacu  | accuuggcucuaagacugcuuacugcugcguaaggagacaggaguaacagucuaacagucaugggcu                  |
| new-gga-miRNA-10 | ugagguaugucgguuuguauuguu  | cgaugcgagccgacuaucuucc    | ugagguaugucgguuuguauuguuggggggcgaggauggggccccacacucgagguaacgaugcagccgacuaucuucc      |
| new-gga-miRNA-11 | ucagugcaucacagaacucuggu   | gaggguucuguccuacacuccggcu | gaggguucuguccuacacuccggcuguggcuauggggagucagugcaucacagaacucuggu                       |
| new-gga-miRNA-12 | agccacugacuaaacgcacauug   | cugugcgugugagacgcggu      | agccacugacuaaacgcacauugugcucucggcgaguccacugugcgugugagacgcggu                         |
| new-gga-miRNA-13 | cuuuuugcgugucgggcuugc     | aagcccuuacccccaaaagcau    | cuuuuugcgugucgggcuugcuguaacaauaccuaccggggaagcccuuacccccaaaagcau                      |
| new-gga-miRNA-14 | aggcaguguauguuaguauagcu   | gcaacuuaacacacugccaca     | aggcaguguauguuaguauagcugcucucauacaccagcaacaauacacugccaca                             |
| new-gga-miRNA-18 | ccucgacacaagcuuuuguc      | gaccugauucugggugcggggu    | gaccugauucugggugcgggguucgucagugagcagagcagcuccucgucgcaucuaugagagugaccucgacacaagcuuuug |
| new-gga-miRNA-20 | gaugaaaucucccuauugccug    | agguaaggugggguucauugaau   | gaugaaaucucccuauugccuguuugugaugguaccgaggaugaggugggguucauugaau                        |
| new-gga-miRNA-21 | guucaggggcucagcagugggc    | ucagugcugugcucagacccc     | ucagugcugugcucagacccccugugaggguuuaggguucaggggcucagcagugggc                           |
| new-gga-miRNA-22 | cacagcaaguguaagacaggca    | ccugucugugccugcugacagg    | ccugucugugccugcugacaggugagaggauugucgacagcaaguguaagacaggca                            |
| new-gga-miRNA-23 | uuccaagucugugguaguca      | acuccaaacaugccuggggaagcu  | acuccaaacaugccuggggaagcuuaguaaaugaaauaaaaauuccaagucugugguaguca                       |
| new-gga-miRNA-25 | ccccaucgaauugcucucag      | aaggcgcaaccgagugggcacc    | ccccaucgaauugcucucagaaucgaugaagcagaaggcgcaaacccgaugggcacc                            |
| new-gga-miRNA-27 | acaucacucuuacugucggg      | cggcagugaggcucacauugc     | cggcagugaggcucacauugcgucgucgcccacaucaacucuuacugucggg                                 |
| new-gga-miRNA-28 | auggcuguuucagcagugauac    | ccuacugcuaagguuugcccuua   | ccuacugcuaagguuugcccuuaaagcugcucuaaauaggcuguuucagcagugauac                           |
| new-gga-miRNA-29 | agagaaucauagaauugccug     | ggaccacaauagaucauagau     | agagaaucauagaauugccuguguuagaaaggaccacaauagaucauagau                                  |
| new-gga-miRNA-31 | aagcagaggaauugaaucugcu    | agagauuccacauccucugauga   | agagauuccacauccucugaugagcaagauucaaggguuaccacuguguaagaagcagaggauugaaucugcu            |
| new-gga-miRNA-32 | gccgacgcccgcugcgccgucg    | agcugcgacccgcgcgcgucgu    | gccgacgcccgcugcgcgugcgagcugcagcugcgacccgcgcgcgucgu                                   |
| new-gga-miRNA-33 | accuaggcuguaagacuguuac    | uaacaaucaaaagccacgucg     | accuaggcuguaagacuguaacccccccagcagcagauacaaucaaaagccacgucg                            |
| new-gga-miRNA-34 | uuugggcaagaacacaggggagc   | cgacccucgggaucucggagau    | uuugggcaagaacacagggggagaccggcgccgccccugggauucuggagau                                 |
| new-gga-miRNA-35 | uuugggugccagccccugucgg    | ggacggggcugggauccaggac    | ggacggggcugggauccaggaccugcugcgggcauuggaaguguuuuugggugccagccccugucgg                  |
| new-gga-miRNA-36 | uuuggcacugacacauuuuugcu   | caauuuuguguauguccaaauu    | uuuggcacugacacauuuuugcuuuuauuguguuuuugagcaauuuuguguauguccaaauu                       |
| new-gga-miRNA-37 | ugauauguuugauuuaggguug    | acuaaaaucaacaauuuucu      | ugauauguuugauuuaggguuuguuugauuggaaaccaauaaaucaacaauuuucu                             |
| new-gga-miRNA-38 | cacugccgucgcgccgccccgc    | cggcgcgccgagccgagggucg    | cggcgcgccgagccgagggucgugucacugccgucgcgccgccccgc                                      |
| new-gga-miRNA-39 | gaucuccaaucugcgcgguuc     | uaacugucuaaaugagagaga     | gaucuccaaucugcgcgguugcauuugcuuugaaguguaacugucguaaaugagagaga                          |
| new-gga-miRNA-40 | uucccggaaccgcuucgugc      | ccaaaggugggcugcggaacuga   | uucccggaaccgcuucgugcugcgagagacaaaggugggcugcggaacuga                                  |
| new-gga-miRNA-41 | uuugggcuguguuuccgccccggg  | ccagguaucugaacaaccacagc   | uuugggcuguguuuccgccccggggcaaacaguuaccgguuauacugaacaaccacagggu                        |
| new-gga-miRNA-42 | ccucgucugugacagcgucucc    | agcugcugucugugugcagau     | agcugcugucugugugcagauagagaugaaggagcuccucugugacagcgucucc                              |
| new-gga-miRNA-43 | cgacacccccgugacagccgu     | ggggucgccccggucugcgugu    | cgacacccccgugacagcgugguccucagugcggggucgccccggucugcgugu                               |
| new-gga-miRNA-44 | ucaugugugucuuucucuccagg   | ugugugagaagcgugcugggagc   | ugugugagaagcgugcugggagcuguguauggcaaacugugugcuaugugucuuucucuccagg                     |
| new-gga-miRNA-45 | gacuccgguggaauagaaggaca   | gcuucacuccacugaauucug     | gcuucacuccacugaauucgguuagguaacgagacagacuccgguugaauagaaggaca                          |
| new-gga-miRNA-46 | ucaucagagaggcugggcucugu   | uaguucagcugucuguaauagag   | uaguucagcugucuguaauaggggagagaccuacagagaggcugggcucugu                                 |
| new-gga-miRNA-47 | acacgcgugugguuugucccagg   | uuuggggacacgugugacacg     | uuuggggacacgugugacacgacggggacacgugugacacgugugacacgugugacacgugugguuugucccagg          |
| new-gga-miRNA-49 | ccccgcgcccugcgugccggc     | cggcgugagcugcgugugcggc    | ccccgcgcccugcgugccggcugugugcgggugcgcgugcggcgugagcugcgugcgggcu                        |
| new-gga-miRNA-50 | agaagagcauuuaauuguguc     | acacauuucagucuccugaa      | agaagagcauuuaauugugcuuacaaacgaacacacauuucagugcuuccugaa                               |
| new-gga-miRNA-51 | auuucacucucagcaggcucc     | ugccugcugugagugaaauugu    | ugccugcugugagugaaauugucugagcugggugccgacuuuaucaauuucacucucagcaggcucc                  |
| new-gga-miRNA-52 | auggcugugagugcgcgugagg    | ucagccgucugcagccuccu      | auggcugugagugcgcgugaggugucagagcauccuccucagccgucugcagccuccu                           |
| new-gga-miRNA-53 | ccggagccucgucucucugugcu   | cacagaggggcgcgcccaac      | ccggagccucgucucucugucagaggcgguagcacaggggcgcgcccaac                                   |
| new-gga-miRNA-55 | ugcgacacacgcgccugaag      | gcuaggacgcgugugcgcgac     | gcuaggacgcgugcgcgacgcuuugacgucagguugcgacacacgcgccugaag                               |
| new-gga-miRNA-56 | ggccauuguucugugggcucu     | accacaacaacauggcgcu       | accacaacaacauggcgcuuacagcgcgcccauguuugcugugggcucu                                    |
| new-gga-miRNA-57 | cccgggugggcacgcuacgg      | cccagcacgcuacccccggcc     | cccgggugggcacgcuacggcacgcgugccccagcacgcuacccccggcc                                   |
| new-gga-miRNA-59 | ucauagagagcagcugugcc      | cagaccugaacuccauugcca     | ucauagagagcagcugucuuauugggacacagcagcgagccagaccucgauccauugcca                         |
| new-gga-miRNA-61 | ccccgcgucgucgugcccg       | agggcacgucggcgugcgcc      | agggcacgucggcgugcgccgaggguggucaccgacccccgcgucgugcccg                                 |
| new-gga-miRNA-62 | cggacgagguuuccgcgcu       | ccgcgcggaagccucggccga     | ccgcgcggaagccucggccgacgacgaaccggcgagcaggcuucccgcgcu                                  |
| new-gga-miRNA-63 | cacuguaugugcugucacgaug    | ggggugcagcaccuacaguguga   | cacuguaugugcugucacgauggggcaggagaagggaugggugcagcaccuacaguguga                         |
| new-gga-miRNA-64 | uuugggucgcuuuccaccccg     | ccagguaucugaacaaccacac    | uuugggucgcuuuccaccccggggcaaacaguuaccagguauaucugaacaaccacacgug                        |
| new-gga-miRNA-65 | ugcugugggcucugcucacc      | gugggcagcaccugggcaug      | gugggcagcaccugggcaugggcgucugcccgucuggggucugcucacc                                    |
| new-gga-miRNA-66 | cugaugugagcgugugcucu      | ugcccgugccucacgcucaagg    | cugaugugagcgugucacuggaucuuuaggaagugcccgugccucacgcucaagg                              |
| new-gga-miRNA-69 | ccuuacaguuuccguccaac      | ugggucggaaaagugaaagggg    | ccuuacaguuuccguccaacagucagagcgaagaagcugggcugggaaaagugaaagggg                         |
| new-gga-miRNA-70 | cugcugggaaucagaguaagg     | uugcucagauuugcagacagcu    | uugcucagauuugcagacagcuuacugucuaagcugcggaauucagaguaagg                                |

|                   |                           |                          |                                                                                        |
|-------------------|---------------------------|--------------------------|----------------------------------------------------------------------------------------|
| new-gga-miRNA-72  | aggcgggucggauucaacagc     | cguugacagccaggacgaccucg  | cguugacagccaggacgaccucgcgcagucagccccaggcaggcgggucggauucaacagc                          |
| new-gga-miRNA-76  | agugcaaaauuagaauaugga     | cauugauucauuuuugucucu    | cauugauucauuuuugucucucauuuuauaagaggagugcaaaauuagaauaauugga                             |
| new-gga-miRNA-77  | aaccaccucaguuuuuucc       | caggaaacugaagugaauu      | aaccaccucaguuuuuuccuuuucguaaaaggcaggcaggaaacauagaugaaau                                |
| new-gga-miRNA-78  | uucaggguugucagagagc       | ucccugcuguucccugggagu    | ucccugcuguucccugggagugcacgacccccuuucaggguugucagagagc                                   |
| new-gga-miRNA-79  | ucguagccuucuuuugaau       | aucaagugaaaggucaagaau    | aucaagugaaaggucaagaauuuuagucauggguuagucugugaccuucuuuugaau                              |
| new-gga-miRNA-80  | uuccagaaccucuauugcacagu   | ugugaugacugguuacuggucca  | uuccagaaccucuauugcacaguguaaccugguaaaaucugcugugaugacugguuacuggucca                      |
| new-gga-miRNA-81  | ccgagcgagcucugcagagccu    | cugucugcaggggccucuccaucc | cugucugcaggggccucuccaucccgugcugcaaggccgagcgagcucugcagagccu                             |
| new-gga-miRNA-83  | aaugcuuacuuugucggacaga    | agcccagacaaguuagauuuau   | agcccagacaaguuagauuuuuuuuuccuccugccauuggaauuguuauugcuuacuuugucggacaga                  |
| new-gga-miRNA-84  | ucacagcccuuccgcccccu      | uggggcugcaggggcugggagau  | uggggcugcaggggcugggagauuggggcucugcagccccucgacauacacgccccuccgcccccu                     |
| new-gga-miRNA-87  | gaagugucacacucacgggcucu   | agccuguuugugaggccuucu    | agccuguuugugaggccuucuuuugcuuacaauucaagaagugucacacucacgggcucu                           |
| new-gga-miRNA-88  | cgggcgggcgggcgguugc       | cgggcgggagguccggcg       | cgggcgggcgggcgguccggcgcgggcgcuuuagugugacgagugcugugcgggcgcgagggcgggagguccggcg           |
| new-gga-miRNA-90  | acugaugacagacgauugccu     | agcugugcucuguuccucaguucu | agcugugcucuguuccucaguuucuggaaguuuuuagcugcagauugacugaugacagagcguugccu                   |
| new-gga-miRNA-92  | ugaaaucuccggccucagcgaguga | cuguugaguucaggauuuucu    | ugaaaucuccggccucagcgagugaggucuaacugcuguuugaguucaggauuuucu                              |
| new-gga-miRNA-93  | gugaggcgggcgguccggagcg    | cgcccccgcgggccucacgc     | gugaggcgggcgguccggagcgcgcgcauccgcccccgggcgcccccgcgggccucacgc                           |
| new-gga-miRNA-94  | guuugucugaaucauucugga     | caagauagauucagaacaacu    | guuugucugaaucauucuggaagaaaaaaucaggcaaaauuaccucuguucaagaauaacuuccaagauagauucagaacaac    |
| new-gga-miRNA-95  | caagagaacaucugggcauuu     | uugcccacauuuucucuucagu   | uugcccacauuuucucuucaguaagagacaaaaaacuacagagaacaucugggcauuu                             |
| new-gga-miRNA-97  | ugugcccacgcagacguacugc    | cagaugucugcgugugccucugu  | cagaugucugcgugugccucugugcauacauuuuacaugugcccacgcagacguacugc                            |
| new-gga-miRNA-98  | agcggacaaggagcaguggcac    | ugccaucguccuuuguccgucg   | agcggacaaggagcaguggcacacgaagugcucugaggccugugacaguuucaugugccaucguccuuuguccgucg          |
| new-gga-miRNA-99  | cagcgucgggcagugcacugc     | agugcagucuguugcagcguggc  | agugcagucuguugcagcguggcacaguuacguuuccuccugcagcgugggcagugcacugc                         |
| new-gga-miRNA-103 | ucagacccccuccgcccccgagu   | gcggggcgcggggugucugagc   | gcggggcgcggggugucugagcgguccuuuggggucucucccgcgugggccucccccccgucagacccccuccgcccccgagu    |
| new-gga-miRNA-104 | guagugcucuauugggacacau    | auggggucucuauugggacacc   | auggggucucuauugggacacaugcgugguuuauagggcuugugaugugcucuauugggacacau                      |
| new-gga-miRNA-107 | acucggcaucgggucugugcc     | ugcagauccggagcuaagagugcu | ugcagauccggagcuaagagugcucuucugcuggcugcacucggcaucgggucugugcc                            |
| new-gga-miRNA-109 | uuucgaucggugugucugcaga    | uuugcagaccaccgaugagaga   | uuugcagaccaccgaugagaaacgaauuuccuuuucgaucggugugucugcaga                                 |
| new-gga-miRNA-110 | augcagaacaguuuucuggacu    | auccugaaaauuguaucgcaug   | auccugaaaauuguaucgcauggguaaagcacagcacugcccaugcagaacaguuuucuggacu                       |
| new-gga-miRNA-112 | ccccacccuacuguucccaga     | uggggagcagugaugugggg     | uggggagcagugauguggggucucccgugcugccccacccuacuguucccaga                                  |
| new-gga-miRNA-113 | ccccacccuacuguucccaga     | uggggagcagugaugugggg     | uggggagcagugauguggggucucccgugcugccccacccuacuguucccaga                                  |
| new-gga-miRNA-114 | acuugcugaaguuuauuggagacc  | auggaugugagaacagcgaggug  | acuugcugaaguuuauuggagaccaaugauggaugugagaacagcgaggugau                                  |
| new-gga-miRNA-115 | cuguacguguccuguuugcu      | gggagcugggacaagcagca     | cuguacguguccuguuugcugcaggggagcugggacaagcagca                                           |
| new-gga-miRNA-119 | cauugggugucagcuacuau      | uaaguacguuagaacgccuaagu  | uaaguacguuagaacagccuaagugcugccuuaagcagucuuuaggguugcacguacuau                           |
| new-gga-miRNA-125 | ccaucuccaccagcagcacugu    | cagugccgacgugugggaguc    | cagugccgacgugugggagucgcccuguggggcagagcccaucuccaccagcagcacugu                           |
| new-gga-miRNA-126 | cuguaaaaauuagaaaaacu      | uuuuuacaucuguuacagc      | cuguaaaaauuagaaaaaacuguaauuauuaguuuuuacaucuguuacagc                                    |
| new-gga-miRNA-131 | ucuggauguuuauagugaggcu    | ucuaaccuuaaaacuuucugau   | ucuggauguuuauagugaggcuuuuauaggguuaccuuaaaacuuucugau                                    |
| new-gga-miRNA-134 | uuucucugcaguggguaaggagc   | uuccuaccuauugggagaaga    | uuccuaccuauugggagaagcuggucaugucugcuuuucugucaguggguaaggagc                              |
| new-gga-miRNA-135 | ucagagagccccagcaauug      | uugggucuggggaucucccgcu   | ucagagagccccagcaauugcagugcuguccuugggcugggggaucucccgcu                                  |
| new-gga-miRNA-136 | cccccgaggggacaccagg       | guggcucuggggacaccaggacc  | guggcucuggggacaccaggaccccccgaggggacaccagg                                              |
| new-gga-miRNA-137 | cagcagccauugcauaccgugc    | cgguggcagcgugggagcuggca  | cgguggcagcgugggagcuggcaggggaccccgagcuggccagcagccauugcauaccgugc                         |
| new-gga-miRNA-140 | gugagggagcugcgacacggagug  | cuggcucugccuccacuca      | gugagggagcugcgacacggaguuuucccauuggcacucccgugcugccuccacuca                              |
| new-gga-miRNA-141 | cugcguaaccgugugugauguc    | acauaccagcgggcgcgacuca   | acauaccagcgggcgcgacucaacauagccacugggggagugcugcguaaccgugugugauguc                       |
| new-gga-miRNA-145 | uccuggcaauugugagcuuc      | aaggugcagcuuugcaguuucc   | uccuggcaauugugagcuucagggcaaaugaaauaaggugcagcuuugcaguuucc                               |
| new-gga-miRNA-149 | gagcagcagaaggauucgagu     | cuuagauacugcugcagcagc    | gagcagcagaaggauucgagugucugacuauuuccacucuuagauacugcugcagcagc                            |
| new-gga-miRNA-154 | caccacgugucgagauauaggc    | agauaucgcauauugagggcug   | agauaucgcauauugagggcugacaaauaacagcugucacacauugcaccacgugucgagauauaggc                   |
| new-gga-miRNA-158 | ccaagcagcacuucagggcagc    | ugcuccagaugucgagggag     | ugcuccagaugucgagggaguccauagucuaauuaccagcagcacuucagggcagc                               |
| new-gga-miRNA-159 | ccagaacacugcgcaucgacc     | gucgaugcgagugcugggucal   | gucgaugcgagugcugggucalugcgaugcgagugcugggucaluggaugagagaauagaccagaacacugcgcaucgacc      |
| new-gga-miRNA-160 | ucagcugcucugagccccagc     | ggggcugaggcuuagugugagci  | ggggcugaggcuuagugugagcugugcuuacuccugcugcagcugcugcugagccccagc                           |
| new-gga-miRNA-161 | ugugcaccagcugggugguaggai  | ccuacaaccaccugugcuggg    | ugugcaccagcugggugguaggaiugugcugggaaagaagccuacaaccaccugugcuggg                          |
| new-gga-miRNA-163 | ugccacuguaagcggggcacc     | uuggccgcugcucagauggacc   | uuggccgcugcucagauggaccugggccgcugcucagauggaccuguuuagguugguuagaggguugccacuguaagcggggcacc |
| new-gga-miRNA-164 | cuuccagcguuugugaguc       | acuaccaacguacuugggauuu   | acuaccaacguacuugggauuuuuuuuacuuuacuaaagcuuccagcguuugugaguc                             |
| new-gga-miRNA-170 | cccgcucugucacugccggc      | cgggcagagcucgagggcgggaa  | cccgcucugucacugccggcugugagguaaccgcgcgggcagagcucgagggcgggaa                             |
| new-gga-miRNA-172 | uguuauaguuuaccacuuacc     | guggguggaauaguuuac       | guggguggaauaguuuacaaauugcuuuuauuaguuuaguuuaccacuuacc                                   |
| new-gga-miRNA-176 | ucucuccaccucuguccccagu    | uuggggcugcaaggugaggcaaa  | uuggggcugcaaggugaggcaaaugggggaauuacugccucuccaccucuguccccagu                            |
| new-gga-miRNA-179 | ugguuguccugagcugcagagc    | agugcacaugccacggac       | agugcacaugccacggacucggggacauugacagcauucccugguuguccugagccugcagagc                       |
| new-gga-miRNA-182 | ccguauuccuuuagugcuuuga    | aagcacaagaggagcacugcu    | aagcacaagaggagcacugcuuucuccuugggagccuaagccguauuuccuugugcuuuga                          |
| new-gga-miRNA-187 | cuccccucagccggcgcgucg     | cgucccgugagggggagcggg    | cuccccucagccggcgcgcgcgggaaagagccgucuccgugagggggagcggg                                  |
| new-gga-miRNA-188 | cuccccucagccggcgcgucg     | cgucccgugagggggagcggg    | cuccccucagccggcgcgcgcgggaaagagccgucuccgugagggggagcggg                                  |
| new-gga-miRNA-191 | cauccagcauccuugcccacguu   | caugagcaggagauugcuggauag | caugagcaggagauugcuggauuagaacacuaucuccuagaagcuuacuccagcauccuugcccacguu                  |
| new-gga-miRNA-218 | gagcaguccuagugagcacc      | guggcacuggggucugcuag     | gagcaguccuagugagcaccagcagugaggcuuggggacuggggucugcuag                                   |
| new-gga-miRNA-234 | cugagugucacagaacuuugcu    | aaaguucugugagcagucacu    | aaaguucugugagucagucacuauucguaacagagucugagugucacagaacuuugcu                             |
| new-gga-miRNA-250 | ucucacugcucccuuuccucaga   | ggggguguggggagcaggaggc   | ggggguguggggagcaggagggucaggggcugcacagcuccucacugcucccuuuccucaga                         |

|                                             |                          |                                                                                    |
|---------------------------------------------|--------------------------|------------------------------------------------------------------------------------|
| new-gga-miRNA-252 caggagcuccugcacaucugc     | aggugugcagggggagcugucga  | aggugugcagggggagcugucgacgauuacuaaggcgucaggagcuccugcacaucugc                        |
| new-gga-miRNA-253 uacaucacguggugugggcguc    | cgucauauugcagcuggggugug  | uacaucacguggugugggcgucgugaugucacgcgggugugagcugauauugcagcuggggugug                  |
| new-gga-miRNA-254 uacaucacguggugugggcguc    | ugucaugcgucaugugugugug   | ugucaugcgucaugugugugugagcugauacggggggggggcgucgugaagggugcagugaucauacacguggugug      |
| new-gga-miRNA-257 uacaucacguggugugggcguc    | cgucauauugcagcuggggugug  | uacaucacguggugugggcgucgugaugucacgcgggugugagcugauauugcagcuggggugug                  |
| new-gga-miRNA-261 uacaucacguggugugggcguc    | ugucaugcgucaugugugugug   | ugucaugcgucaugugugugugagcugauacggggggggggggcgucgugaagggugcagugaucauacacguggugug    |
| new-gga-miRNA-301 cacgcccgggaugcagcgaggcg   | cgucgcaucccgcgcuacccc    | cacgcccgggaugcagcgaggcgcuuccgccucgucgaucccgcgcuacccc                               |
| new-gga-miRNA-329 caucuuaggauauaagguaaccug  | uaccugcaccccaagauagcugg  | caucuuaggauauaagguaaccugauagaggugugcagcagguaccugcaccccaagauagcugg                  |
| new-gga-miRNA-361 cucuagcccccucugugccagg    | ucuggggcacaaaggggcagugg  | ucuggggcacaaaggggcagugggagcaggggagcuccuagcccccucugugccagg                          |
| new-gga-miRNA-377 cugcuugcccaggauugggggu    | agccccaccaugggcaggggaga  | cugcuugcccaggauugggggugaugugugggcgcagccccaccaugggcaggggaga                         |
| new-gga-miRNA-408 uuucggcuguuuuccggcgacugc  | uuccggaaaucgcggaagcgag   | uuccggaaaucgcggaagcgagccgaacgcgcuccauuuucuguuuuccggcgacugc                         |
| new-gga-miRNA-416 ugucugaaccagugcagcucucu   | aggggugcugcuggauuug      | ugucugaaccagugcagcucucuugauuagcuaggggugcugcuggauuug                                |
| new-gga-miRNA-461 cacacacauauauauacaca      | uauauauaugugcaguguguuu   | uauauauaugugcaguguguuuauauauauacauauauacacacacauauauauacaca                        |
| new-gga-miRNA-467 caccuugggagagauuuuaggaggi | ccuauaaaaugaauggccuugga; | ccuauaaaaugaauggccuuggaaggugcagauaggagcagaaguggugugccuacucaccuugggagagauuuuaggaggi |
| new-gga-miRNA-484 ucaggaggugcugcacaugacu    | ucuuuugugugggcuuaccuuga  | ucuuuugugugggcuuaccuuggaggagauagucaucucaggaggugcugcacaugacu                        |
| new-gga-miRNA-485 cuggaccgcccgcugguuaga     | acugaucaagguggugugacag   | acugaucaagguggugugagacgauuuucuaaaucucgucgaccgcccgcugguuaga                         |
| new-gga-miRNA-486 cauaguaggaaaaggauguauu    | uuuuuuuuccuacucuuugaagu  | uuuuuuuuccuacucuuugaaguuuuacucugauuacauaguaggaaaaggauguauu                         |
| new-gga-miRNA-526 uuuggcaaugguagaacucacacu  | ggugguuucagacuugccaacu   | uuuggcaaugguagaacucacacugugcgcucgcaggauuccggugguuucagacuugccaacu                   |
| new-gga-miRNA-548 cugguuguacucgucuccagg     | cguggggggaaagugcaauccu   | cguggggggaaagugcaauccugcauuuggaaaccugguuguacucgucuccagg                            |
| new-gga-miRNA-637 aagaggauugaauugcaagacu    | uuguauuuuuuuccuucuaga    | aagaggauugaauugcaagacuuuguuuuugaacacucuuuguauuuuuuccuucuaga                        |
| new-gga-miRNA-255 caugggcugacgaaccugagauu   | uucucagguuagacaguccucg   | caugggcugacgaaccugagauuagaccuauuuaccuuucucagguuagacaguccucg                        |
| new-gga-miRNA-33* uaacaaucaaaagccacggucg    | accauggcuguaagacuguuac   | accauggcuguaagacuguuacccccacgacgacagauaacaaucaaaagccacggucg                        |
| new-gga-miRNA-55* gcuqggagcgcgcuqcgcgac     | uqcgcacacacgcgcuccuag    | gcuqggagcgcgcuqcgcgacgcuuugacgucagguugcgcgacacacgcgcuccuag                         |

precursor coordinate  
chr13:8493108..8493164:-  
chr12:11670979..11671039:+  
chr12:11671363..11671426:+  
chr20:9710469..9710531:+  
chr33:1093263..1093324:+  
chr19:5515026..5515081:+  
chr19:5515202..5515261:-  
chr18:9383535..9383595:+  
chr19:5515770..5515834:-  
chrUn\_NT\_467319v1:10243..10320:-  
chr33:1171914..1171974:+  
chr5:15887078..15887137:+  
chr5:21516911..21516976:+  
chrZ:16702090..16702149:-  
chr1\_NT\_456790v1\_random:3303..3391:+  
chr2:412762..412823:+  
chr11:17925070..17925127:-  
chr8:4658341..4658400:-  
chr4:63482790..63482853:-  
chr30\_NT\_463422v1\_random:25881..25938:-  
chr19:5515021..5515080:-  
chr3:87380940..87381002:+  
chr3:104167657..104167708:-  
chr1:105405945..105406020:+  
chrUn\_NT\_474236v1:2804..2857:+  
chr19:5515205..5515264:+  
chrW:4032982..4033036:+  
chr5:85802..85869:+  
chr1:844265..844329:-  
chr25:2120335..2120393:-  
chrZ:70733193..70733241:+  
chr14:6179802..6179865:-  
chr4:39800704..39800764:-  
chrUn\_NT\_470743v1:5875..5936:+  
chr4:2679511..2679569:+  
chr33:1576506..1576565:-  
chr12:3154777..3154845:+  
chr26:3076088..3076146:-  
chr13:17162740..17162796:-  
chrUn\_NT\_467787v1:10611..10694:-  
chr18:6449723..6449784:+  
chr1:168016562..168016620:-  
chr1:144520190..144520257:+  
chr3:96912434..96912493:-  
chr10:776513..776571:-  
chrUn\_NT\_477504v1:1263..1324:-  
chr3:87049050..87049106:+  
chr22\_NT\_463025v1\_random:5999..6058:-  
chr23:1881170..1881233:-  
chr3:110315775..110315834:+  
chr3:81811344..81811399:+  
chr20:9815102..9815165:-  
chrUn\_NT\_465451v1:14005..14067:+  
chr4:5200275..5200327:+  
chr1:120628360..120628419:-  
chr10:19996779..19996841:-  
chr2:138962172..138962230:+

chr5:54895096..54895160:+  
chr19:8077898..8077957:+  
chr8:24660322..24660381:+  
chr4\_NT\_459802v1\_random:59958..60011:+  
chr1:50452618..50452677:-  
chr1:38476097..38476161:+  
chr8:7496343..7496401:+  
chr28:3936705..3936775:+  
chrUn\_NT\_464201v1:17930..17997:+  
chrZ:43198296..43198356:+  
chr1\_NT\_456372v1\_random:327..407:+  
chrZ:78517883..78517952:-  
chr2:77455962..77456016:+  
chr15:743032..743092:+  
chr1:54275698..54275786:+  
chr4:81629139..81629199:+  
chr21:3969023..3969082:-  
chr12:5317530..5317608:+  
chr3:105077421..105077483:-  
chr10:1255073..1255158:+  
chrUn\_NT\_472274v1:5224..5288:+  
chr13:17076576..17076635:-  
chr10:14704761..14704821:-  
chr10:12646179..12646243:+  
chr1:673523..673581:+  
chr1:669624..669682:+  
chr7:8442018..8442072:-  
chr5:49858552..49858596:+  
chr4:60872218..60872279:-  
chr17:1481029..1481088:+  
chr2:10086790..10086850:-  
chr19:6035263..6035320:+  
chr6:30237281..30237343:+  
chr13:2583452..2583510:+  
chrUn\_NT\_464199v1:35433..35475:+  
chr12:3212327..3212391:-  
chr2:4083125..4083188:+  
chrUn\_NT\_472355v1:310..374:+  
chr10:11190072..11190130:-  
chr4:81308881..81308941:-  
chrUn\_NT\_476753v1:1940..2010:+  
chr12:11377981..11378039:-  
chr18:2872432..2872494:+  
chr12:9880190..9880252:+  
chr1:94675708..94675766:+  
chr18:47469..47534:-  
chr4:63482793..63482855:+  
chr10:10695490..10695551:+  
chr4:21653671..21653726:+  
chr4:12350734..12350793:-  
chr1:56702638..56702704:-  
chr23:5297200..5297265:-  
chr7\_NT\_461159v1\_random:2192..2248:+  
chr7:30573447..30573503:-  
chr1:92125249..92125316:+  
chr5:59355708..59355765:+  
chr2:32178259..32178320:+  
chr27:5284831..5284897:-

chr15:10688663..10688723:-  
chrUn\_NT\_469680v1:596..660:+  
chrUn\_NT\_469680v1:530..618:+  
chrUn\_NT\_471667v1:612..675:+  
chrUn\_NT\_471667v1:544..634:+  
chrUn\_NT\_465151v1:2037..2089:-  
chr2:145259934..145259997:-  
chr10:20135923..20135981:-  
chr26:4908131..4908189:+  
chr2:32251637..32251703:-  
chr1:51713695..51713747:+  
chr11:7747549..7747611:+  
chr4:21963808..21963893:-  
chr1:62218231..62218290:-  
chr4:35126567..35126626:-  
chrZ:40033855..40033916:-  
chr1:843242..843306:-  
chr8:21706755..21706811:-  
chr22:854558..854617:-  
chr20:9710466..9710529:-  
chr19:5515205..5515265:+  
chrUn\_NT\_477504v1:1263..1324:-
