# Supplementary material
Source: Frontiers journal article supplement (https://www.frontiersin.org/articles/523991)
Supplement: Data_Sheet_1.ZIP [file Data_Sheet_1.ZIP]

Fig S4. Q-PCR verification sequencing results

(A) High throughput sequencing of miRNA expression;  
(B) MiRNA expression using q-PCR;

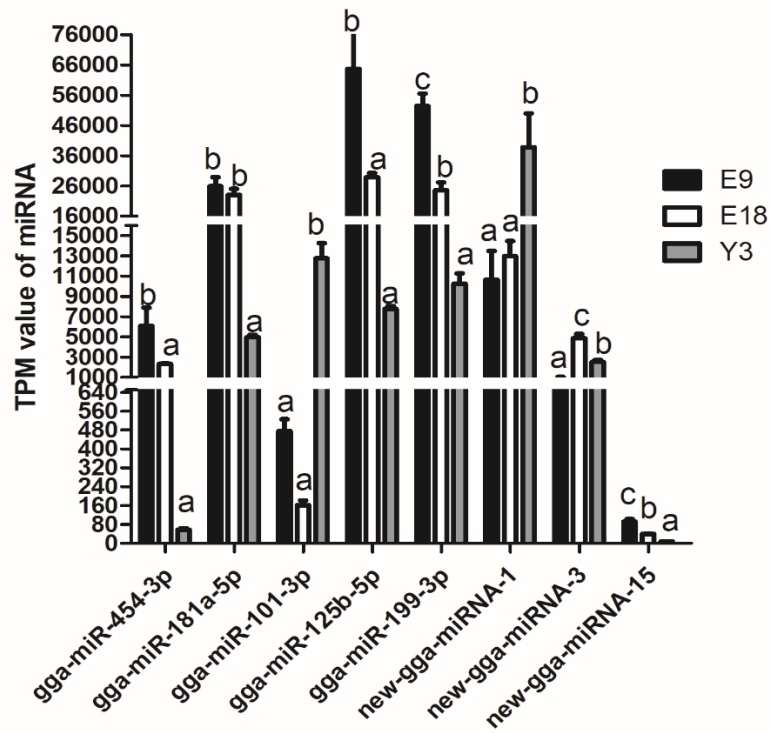

(A)

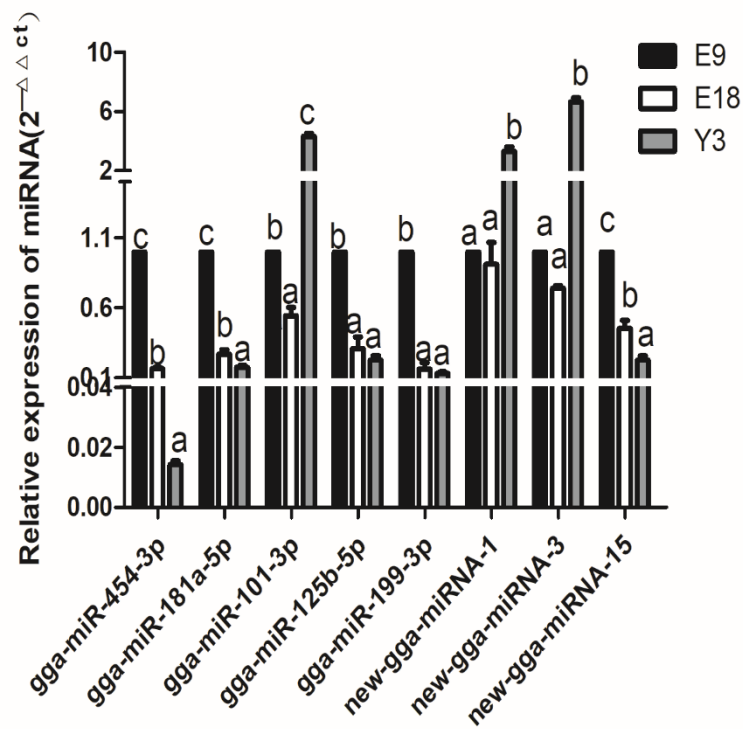

(B)
