# Supplementary material
Source: Frontiers journal article supplement (https://www.frontiersin.org/articles/523991)

Fig S1. The count of miRNA species

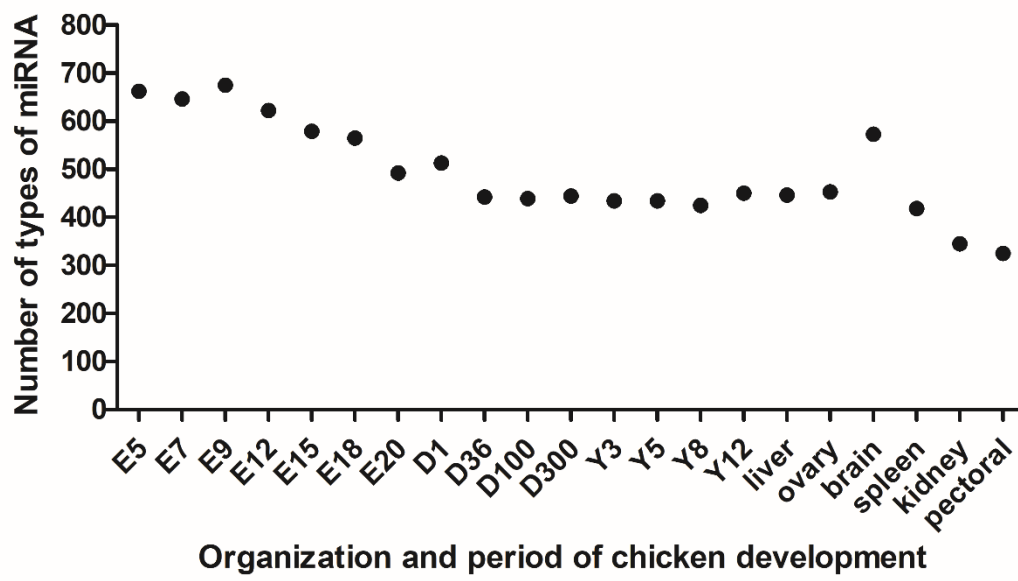

Supplement: Data_Sheet_1.ZIP [file Data_Sheet_1.ZIP]

Fig S2. Length distribution of total clean reads

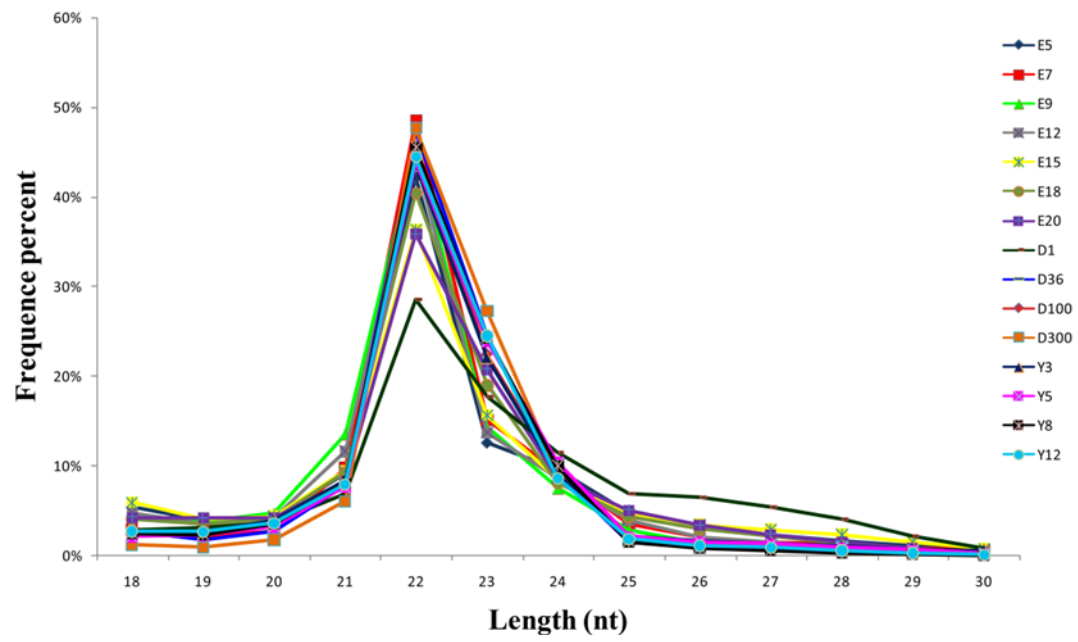

Supplement: Data_Sheet_1.ZIP [file Data_Sheet_1.ZIP]
